# Supplementary material for: Trends among platelet function, arterial calcium, and vascular function measures
Source: Platelets. Author manuscript; Available in PMC 2024 Mar 18. (PMC10947606; doi:10.1080/09537104.2023.2238835)
Supplement: Supp 2 [file NIHMS1923445-supplement-Supp_2.xlsx]

## Sheet: S1.variable_definitions
Analysis Output Variable	Full Description	Platform	Cell type	Agonist	Concentration(s)	Positive Beta Interpretation
AA_AUC.std	Arachidonic acid (AUC)	LTA	PRP (from sodium citrated blood)	AA	500 μg/mL	↑ platelet reactivity
Aa_FinAgg	Arachidonic acid final % aggregation	LTA	PRP (from sodium citrated blood)	AA	500 μg/mL	↑ platelet reactivity
Aa_LagTim	Lag time (s) to arachidonic acid	LTA	PRP (from sodium citrated blood)	AA	500 μg/mL	↓ platelet reactivity
Aa_MaxAgg	Arachidonic acid maximal % aggregation (LTA)	LTA	PRP (from sodium citrated blood)	AA	500 μg/mL	↑ platelet reactivity
Aa_PrimAgg	Arachidonic acid primary wave % aggregation	LTA	PRP (from sodium citrated blood)	AA	500 μg/mL	↑ platelet reactivity
Aa_PrimSlope	Arachidonic acid primary wave slope	LTA	PRP (from sodium citrated blood)	AA	500 μg/mL	↑ platelet reactivity
AAAgg20	Arachidonic acid concentration needed to reach 20% aggregation	Optimul (plate-based concentration range)	PRP (from sodium citrated blood)	AA	0.03, 0.06, 0.11, 0.19, 0.33, 0.57 and 1.0 mM	↓ platelet reactivity
AAAgg40	Arachidonic acid concentration needed to reach 40% aggregation	Optimul (plate-based concentration range)	PRP (from sodium citrated blood)	AA	0.03, 0.06, 0.11, 0.19, 0.33, 0.57 and 1.0 mM	↓ platelet reactivity
AAaucMean	Arachidonic acid (AUC) across concentration range	Optimul (plate-based concentration range)	PRP (from sodium citrated blood)	AA	0.03, 0.06, 0.11, 0.19, 0.33, 0.57 and 1.0 mM	↑ platelet reactivity
AAec50	Arachidonic acid concentration needed to reach 50% aggregation	Optimul (plate-based concentration range)	PRP (from sodium citrated blood)	AA	0.03, 0.06, 0.11, 0.19, 0.33, 0.57 and 1.0 mM	↓ platelet reactivity
AAecMax	Arachidonic acid concentration needed to reach maximal aggregation	Optimul (plate-based concentration range)	PRP (from sodium citrated blood)	AA	0.03, 0.06, 0.11, 0.19, 0.33, 0.57 and 1.0 mM	↓ platelet reactivity
AAeMax	Arachidonic acid maximal % aggregation (Optimul)	Optimul (plate-based concentration range)	PRP (from sodium citrated blood)	AA	0.03, 0.06, 0.11, 0.19, 0.33, 0.57 and 1.0 mM	↑ platelet reactivity
AAslope	Arachidonic acid slope across concentration range	Optimul (plate-based concentration range)	PRP (from sodium citrated blood)	AA	0.03, 0.06, 0.11, 0.19, 0.33, 0.57 and 1.0 mM	↑ platelet reactivity
ADPAgg20	ADP concentration needed to reach 20% aggregation	Optimul (plate-based concentration range)	PRP (from sodium citrated blood)	ADP	0.005, 0.02, 0.10, 0.44, 1.98, 8.89 and 40 µM	↓ platelet reactivity
ADPAgg40	ADP concentration needed to reach 40% aggregation	Optimul (plate-based concentration range)	PRP (from sodium citrated blood)	ADP	0.005, 0.02, 0.10, 0.44, 1.98, 8.89 and 40 µM	↓ platelet reactivity
ADPaucMean	ADP (AUC) across concentration range	Optimul (plate-based concentration range)	PRP (from sodium citrated blood)	ADP	0.005, 0.02, 0.10, 0.44, 1.98, 8.89 and 40 µM	↑ platelet reactivity
ADPec50	ADP concentration needed to reach 50% aggregation	Optimul (plate-based concentration range)	PRP (from sodium citrated blood)	ADP	0.005, 0.02, 0.10, 0.44, 1.98, 8.89 and 40 µM	↓ platelet reactivity
ADPecMax	ADP concentration needed to reach maximal aggregation	Optimul (plate-based concentration range)	PRP (from sodium citrated blood)	ADP	0.005, 0.02, 0.10, 0.44, 1.98, 8.89 and 40 µM	↓ platelet reactivity
ADPeMax	ADP maximal % aggregation (Optimul)	Optimul (plate-based concentration range)	PRP (from sodium citrated blood)	ADP	0.005, 0.02, 0.10, 0.44, 1.98, 8.89 and 40 µM	↑ platelet reactivity
ADPhigh_AUC	ADP (5.71 μM) (AUC)	LTA	PRP (from sodium citrated blood)	ADP	5.71 μM	↑ platelet reactivity
ADPhigh_DisAgg	ADP (5.71 μM) % disaggregation	LTA	PRP (from sodium citrated blood)	ADP	5.71 μM	↓ platelet reactivity
ADPhigh_FinAgg	ADP (5.71 μM) final % aggregation	LTA	PRP (from sodium citrated blood)	ADP	5.71 μM	↑ platelet reactivity
ADPhigh_MaxAgg	ADP (5.71 μM) maximal % aggregation (LTA)	LTA	PRP (from sodium citrated blood)	ADP	5.71 μM	↑ platelet reactivity
ADPhigh_PrimAgg	ADP (5.71 μM) primary wave % aggregation	LTA	PRP (from sodium citrated blood)	ADP	5.71 μM	↑ platelet reactivity
ADPhigh_PrimSlope	ADP (5.71 μM) primary wave slope	LTA	PRP (from sodium citrated blood)	ADP	5.71 μM	↑ platelet reactivity
ADPlow_AUC	ADP (0.95 μM) (AUC)	LTA	PRP (from sodium citrated blood)	ADP	0.98 μM	↑ platelet reactivity
ADPlow_DisAgg	ADP (0.95 μM) % disaggregation	LTA	PRP (from sodium citrated blood)	ADP	0.98 μM	↓ platelet reactivity
ADPlow_FinAgg	ADP (0.95 μM) final % aggregation	LTA	PRP (from sodium citrated blood)	ADP	0.98 μM	↑ platelet reactivity
ADPlow_MaxAgg	ADP (0.95 μM) maximal % aggregation (LTA)	LTA	PRP (from sodium citrated blood)	ADP	0.98 μM	↑ platelet reactivity
ADPlow_PrimAgg	ADP (0.95 μM) primary wave % aggregation	LTA	PRP (from sodium citrated blood)	ADP	0.98 μM	↑ platelet reactivity
ADPlow_PrimSlope	ADP (0.95 μM) primary wave slope	LTA	PRP (from sodium citrated blood)	ADP	0.98 μM	↑ platelet reactivity
ADPlow_SecAgg	ADP (0.95 μM) concentration secondary wave % aggregation	LTA	PRP (from sodium citrated blood)	ADP	0.98 μM	↑ platelet reactivity
ADPlow_SecSlp	ADP (0.95 μM) concentration secondary wave slope	LTA	PRP (from sodium citrated blood)	ADP	0.98 μM	↑ platelet reactivity
ADPmid_AUC	ADP (1.82 μM) (AUC)	LTA	PRP (from sodium citrated blood)	ADP	1.82 μM	↑ platelet reactivity
ADPmid_DisAgg	ADP (1.82 μM) % disaggregation	LTA	PRP (from sodium citrated blood)	ADP	1.82 μM	↓ platelet reactivity
ADPmid_FinAgg	ADP (1.82 μM) final % aggregation	LTA	PRP (from sodium citrated blood)	ADP	1.82 μM	↑ platelet reactivity
ADPmid_MaxAgg	ADP (1.82 μM) maximal % aggregation (LTA)	LTA	PRP (from sodium citrated blood)	ADP	1.82 μM	↑ platelet reactivity
ADPmid_PrimAgg	ADP (1.82 μM) primary wave % aggregation	LTA	PRP (from sodium citrated blood)	ADP	1.82 μM	↑ platelet reactivity
ADPmid_PrimSlope	ADP (1.82 μM) primary wave slope	LTA	PRP (from sodium citrated blood)	ADP	1.82 μM	↑ platelet reactivity
ADPmid_SecAgg	ADP (1.82 μM) concentration secondary wave % aggregation	LTA	PRP (from sodium citrated blood)	ADP	1.82 μM	↑ platelet reactivity
ADPmid_SecSlp	ADP (1.82 μM) concentration secondary wave slope	LTA	PRP (from sodium citrated blood)	ADP	1.82 μM	↑ platelet reactivity
ADPslope	ADP slope across concentration range	Optimul (plate-based concentration range)	PRP (from sodium citrated blood)	ADP	0.005, 0.02, 0.10, 0.44, 1.98, 8.89 and 40 µM	↑ platelet reactivity
Coll_AUC.std	Collagen (AUC)	LTA	PRP (from sodium citrated blood)	Collagen	190 μg/mL	↑ platelet reactivity
Coll_FinAgg	Collagen final % aggregation	LTA	PRP (from sodium citrated blood)	Collagen	190 μg/mL	↑ platelet reactivity
Coll_LagTim	Lag time (s) to collagen	LTA	PRP (from sodium citrated blood)	Collagen	190 μg/mL	↓ platelet reactivity
Coll_MaxAgg	Collagen maximal % aggregation (LTA)	LTA	PRP (from sodium citrated blood)	Collagen	190 μg/mL	↑ platelet reactivity
Coll_PrimAgg	Collagen primary wave % aggregation	LTA	PRP (from sodium citrated blood)	Collagen	190 μg/mL	↑ platelet reactivity
Coll_PrimSlope	Collagen primary wave slope	LTA	PRP (from sodium citrated blood)	Collagen	190 μg/mL	↑ platelet reactivity
CollAgg20	Collagen concentration needed to reach 20% aggregation	Optimul (plate-based concentration range)	PRP (from sodium citrated blood)	Collagen	0.01, 0.04, 0.16, 0.62, 2.5, 10 and 40 µg/mL	↓ platelet reactivity
CollAgg40	Collagen concentration needed to reach 40% aggregation	Optimul (plate-based concentration range)	PRP (from sodium citrated blood)	Collagen	0.01, 0.04, 0.16, 0.62, 2.5, 10 and 40 µg/mL	↓ platelet reactivity
CollaucMean	Collagen (AUC) across concentration range	Optimul (plate-based concentration range)	PRP (from sodium citrated blood)	Collagen	0.01, 0.04, 0.16, 0.62, 2.5, 10 and 40 µg/mL	↑ platelet reactivity
Collec50	Collagen concentration needed to reach 50% aggregation	Optimul (plate-based concentration range)	PRP (from sodium citrated blood)	Collagen	0.01, 0.04, 0.16, 0.62, 2.5, 10 and 40 µg/mL	↓ platelet reactivity
CollecMax	Collagen concentration needed to reach maximal aggregation	Optimul (plate-based concentration range)	PRP (from sodium citrated blood)	Collagen	0.01, 0.04, 0.16, 0.62, 2.5, 10 and 40 µg/mL	↓ platelet reactivity
ColleMax	Collagen maximal % aggregation (Optimul)	Optimul (plate-based concentration range)	PRP (from sodium citrated blood)	Collagen	0.01, 0.04, 0.16, 0.62, 2.5, 10 and 40 µg/mL	↑ platelet reactivity
Collslope	Collagen slope across concentration range	Optimul (plate-based concentration range)	PRP (from sodium citrated blood)	Collagen	0.01, 0.04, 0.16, 0.62, 2.5, 10 and 40 µg/mL	↑ platelet reactivity
Epi10_AUC.std	Epinephrine (AUC)	LTA	PRP (from sodium citrated blood)	Epinephrine	100 μM	↑ platelet reactivity
Epi10_FinAgg	Epinephrine final % aggregation	LTA	PRP (from sodium citrated blood)	Epinephrine	100 μM	↑ platelet reactivity
Epi10_MaxAgg	Epinephrine maximal % aggregation (LTA)	LTA	PRP (from sodium citrated blood)	Epinephrine	100 μM	↑ platelet reactivity
Epi10_PrimAgg	Epinephrine primary wave % aggregation	LTA	PRP (from sodium citrated blood)	Epinephrine	100 μM	↑ platelet reactivity
Epi10_PrimSlope	Epinephrine primary wave slope	LTA	PRP (from sodium citrated blood)	Epinephrine	100 μM	↑ platelet reactivity
Epi10_SecAgg	Epinephrine secondary wave % aggregation	LTA	PRP (from sodium citrated blood)	Epinephrine	100 μM	↑ platelet reactivity
Epi10_SecSlp	Epinephrine secondary wave slope	LTA	PRP (from sodium citrated blood)	Epinephrine	100 μM	↑ platelet reactivity
EpiAgg20	Epinephrine concentration needed to reach 20% aggregation	Optimul (plate-based concentration range)	PRP (from sodium citrated blood)	Epinephrine	0.0004, 0.001, 0.01, 0.06, 0.33, 1.82 and 10 µM	↓ platelet reactivity
EpiAgg40	Epinephrine concentration needed to reach 40% aggregation	Optimul (plate-based concentration range)	PRP (from sodium citrated blood)	Epinephrine	0.0004, 0.001, 0.01, 0.06, 0.33, 1.82 and 10 µM	↓ platelet reactivity
EpiaucMean	Epinephrine (AUC) across concentration range	Optimul (plate-based concentration range)	PRP (from sodium citrated blood)	Epinephrine	0.0004, 0.001, 0.01, 0.06, 0.33, 1.82 and 10 µM	↑ platelet reactivity
Epiec50	Epinephrine concentration needed to reach 50% aggregation	Optimul (plate-based concentration range)	PRP (from sodium citrated blood)	Epinephrine	0.0004, 0.001, 0.01, 0.06, 0.33, 1.82 and 10 µM	↓ platelet reactivity
EpiecMax	Epinephrine concentration needed to reach maximal aggregation	Optimul (plate-based concentration range)	PRP (from sodium citrated blood)	Epinephrine	0.0004, 0.001, 0.01, 0.06, 0.33, 1.82 and 10 µM	↓ platelet reactivity
EpieMax	Epinephrine maximal % aggregation (Optimul)	Optimul (plate-based concentration range)	PRP (from sodium citrated blood)	Epinephrine	0.0004, 0.001, 0.01, 0.06, 0.33, 1.82 and 10 µM	↑ platelet reactivity
Epislope	Epinephrine slope across concentration range	Optimul (plate-based concentration range)	PRP (from sodium citrated blood)	Epinephrine	0.0004, 0.001, 0.01, 0.06, 0.33, 1.82 and 10 µM	↑ platelet reactivity
FI_prp_PAC1%	Percent PAC1+ positive platelets (PRP)	Flow cytometry	PRP (from sodium citrated blood)	ADP	20 μM	↑ cell count
FI_prp_PAC1_Psel_DoublePos%	Percent PAC1+ and CD62P+ positive platelets (PRP)	Flow cytometry	PRP (from sodium citrated blood)	ADP	20 μM	↑ cell count
FI_prp_Psel%	Percent CD62P+ positive platelets (PRP)	Flow cytometry	PRP (from sodium citrated blood)	ADP	20 μM	↑ cell count
FI_wb_PAC1%	Percent PAC1+ positive platelets (WB)	Flow cytometry	Whole blood (for hirudin blood tube)	ADP	20 μM	↑ cell count
FI_wb_PAC1Psel_DoublePos%	Percent PAC1+ and CD62P+ positive platelets (WB)	Flow cytometry	Whole blood (for hirudin blood tube)	ADP	20 μM	↑ cell count
FI_wb_PSel%	Percent CD62P+ positive platelets (WB)	Flow cytometry	Whole blood (for hirudin blood tube)	ADP	20 μM	↑ cell count
MPadpAgg	ADP impedance aggregation	Multiplate (Impedance aggregometry)	Whole blood (for hirudin blood tube)	ADP	3.19 μM	↑ platelet reactivity
MPadpAUC	ADP impedance AUC	Multiplate (Impedance aggregometry)	Whole blood (for hirudin blood tube)	ADP	3.19 μM	↑ platelet reactivity
MPadpVel	ADP impedance velocity	Multiplate (Impedance aggregometry)	Whole blood (for hirudin blood tube)	ADP	3.19 μM	↑ platelet reactivity
MPaspiAgg	Arachidonic acid impedance aggregation	Multiplate (Impedance aggregometry)	Whole blood (for hirudin blood tube)	AA	0.5 mM	↑ platelet reactivity
MPaspiAUC	Arachidonic acid impedance AUC	Multiplate (Impedance aggregometry)	Whole blood (for hirudin blood tube)	AA	0.5 mM	↑ platelet reactivity
MPaspiVel	Arachidonic acid impedance velocity	Multiplate (Impedance aggregometry)	Whole blood (for hirudin blood tube)	AA	0.5 mM	↑ platelet reactivity
MPcolAgg	Collagen impedance aggregation	Multiplate (Impedance aggregometry)	Whole blood (for hirudin blood tube)	Collagen	61.0 μg/mL	↑ platelet reactivity
MPcolAUC	Collagen impedance AUC	Multiplate (Impedance aggregometry)	Whole blood (for hirudin blood tube)	Collagen	61.0 μg/mL	↑ platelet reactivity
MPcolVel	Collagen impedance velocity	Multiplate (Impedance aggregometry)	Whole blood (for hirudin blood tube)	Collagen	61.0 μg/mL	↑ platelet reactivity
MPristoAgg	Ristocetin impedance aggregation	Multiplate (Impedance aggregometry)	Whole blood (for hirudin blood tube)	Ristocetin	1.15 mg/mL	↑ platelet reactivity
MPristoAUC	Ristocetin impedance AUC	Multiplate (Impedance aggregometry)	Whole blood (for hirudin blood tube)	Ristocetin	1.15 mg/mL	↑ platelet reactivity
MPristoVel	Ristocetin impedance velocity	Multiplate (Impedance aggregometry)	Whole blood (for hirudin blood tube)	Ristocetin	1.15 mg/mL	↑ platelet reactivity
MPtrapAgg	TRAP-6 impedance aggregation	Multiplate (Impedance aggregometry)	Whole blood (for hirudin blood tube)	TRAP-6	4.48 μM	↑ platelet reactivity
MPtrapAUC	TRAP-6 impedance AUC	Multiplate (Impedance aggregometry)	Whole blood (for hirudin blood tube)	TRAP-6	4.48 μM	↑ platelet reactivity
MPtrapVel	TRAP-6 impedance velocity	Multiplate (Impedance aggregometry)	Whole blood (for hirudin blood tube)	TRAP-6	4.48 μM	↑ platelet reactivity
Risto_AUC	Ristocetin (AUC)	LTA	PRP (from sodium citrated blood)	Ristocetin	1.5 mg/mL	↑ platelet reactivity
Risto_DisAgg	Ristocetin % disaggregation	LTA	PRP (from sodium citrated blood)	Ristocetin	1.5 mg/mL	↓ platelet reactivity
Risto_FinAgg	Ristocetin final % aggregation	LTA	PRP (from sodium citrated blood)	Ristocetin	1.5 mg/mL	↑ platelet reactivity
Risto_MaxAgg	Ristocetin maximal % aggregation (LTA)	LTA	PRP (from sodium citrated blood)	Ristocetin	1.5 mg/mL	↑ platelet reactivity
Risto_PrimAgg	Ristocetin primary wave % aggregation	LTA	PRP (from sodium citrated blood)	Ristocetin	1.5 mg/mL	↑ platelet reactivity
Risto_PrimSlope	Ristocetin primary wave slope	LTA	PRP (from sodium citrated blood)	Ristocetin	1.5 mg/mL	↑ platelet reactivity
RistoAgg20	Ristocetin concentration needed to reach 20% aggregation	Optimul (plate-based concentration range)	PRP (from sodium citrated blood)	Ristocetin	0.14, 0.24, 0.43, 0.75, 1.31, 2.29 and 4 mg/mL	↓ platelet reactivity
RistoAgg40	Ristocetin concentration needed to reach 40% aggregation	Optimul (plate-based concentration range)	PRP (from sodium citrated blood)	Ristocetin	0.14, 0.24, 0.43, 0.75, 1.31, 2.29 and 4 mg/mL	↓ platelet reactivity
RistoaucMean	Ristocetin (AUC) across concentration range	Optimul (plate-based concentration range)	PRP (from sodium citrated blood)	Ristocetin	0.14, 0.24, 0.43, 0.75, 1.31, 2.29 and 4 mg/mL	↑ platelet reactivity
Ristoec50	Ristocetin concentration needed to reach 50% aggregation	Optimul (plate-based concentration range)	PRP (from sodium citrated blood)	Ristocetin	0.14, 0.24, 0.43, 0.75, 1.31, 2.29 and 4 mg/mL	↓ platelet reactivity
RistoecMax	Ristocetin concentration needed to reach maximal aggregation	Optimul (plate-based concentration range)	PRP (from sodium citrated blood)	Ristocetin	0.14, 0.24, 0.43, 0.75, 1.31, 2.29 and 4 mg/mL	↓ platelet reactivity
RistoeMax	Ristocetin maximal % aggregation (Optimul)	Optimul (plate-based concentration range)	PRP (from sodium citrated blood)	Ristocetin	0.14, 0.24, 0.43, 0.75, 1.31, 2.29 and 4 mg/mL	↑ platelet reactivity
Ristoslope	Ristocetin slope across concentration range	Optimul (plate-based concentration range)	PRP (from sodium citrated blood)	Ristocetin	0.14, 0.24, 0.43, 0.75, 1.31, 2.29 and 4 mg/mL	↑ platelet reactivity
Trap_AUC	TRAP-6 (AUC)	LTA	PRP (from sodium citrated blood)	TRAP-6	0.67mM	↑ platelet reactivity
Trap_FinAgg	TRAP-6 final % aggregation	LTA	PRP (from sodium citrated blood)	TRAP-6	0.67mM	↑ platelet reactivity
Trap_MaxAgg	TRAP-6 maximal % aggregation (LTA)	LTA	PRP (from sodium citrated blood)	TRAP-6	0.67mM	↑ platelet reactivity
Trap_PrimAgg	TRAP-6 primary wave % aggregation	LTA	PRP (from sodium citrated blood)	TRAP-6	0.67mM	↑ platelet reactivity
Trap_PrimSlope	TRAP-6 primary wave slope	LTA	PRP (from sodium citrated blood)	TRAP-6	0.67mM	↑ platelet reactivity
TRAP6aucMean	TRAP-6 (AUC) across concentration range	Optimul (plate-based concentration range)	PRP (from sodium citrated blood)	TRAP-6	1.5μM-1.8mM	↑ platelet reactivity
TRAP6eMax	TRAP-6 maximal % aggregation (Optimul)	Optimul (plate-based concentration range)	PRP (from sodium citrated blood)	TRAP-6	1.5μM-1.8mM	↑ platelet reactivity
TTAS_AUC	Platelet thrombus formation over collagen under shear (AUC)	TTAS (collagen shear micro-channels)	Whole blood (for hirudin blood tube)	Collagen	coated on surface	↑ platelet reactivity
U46619Agg20	U46619 concentration needed to reach 20% aggregation	Optimul (plate-based concentration range)	PRP (from sodium citrated blood)	U46619	0.005, 0.02, 0.10, 0.44, 1.98, 8.89 and 40 µM	↓ platelet reactivity
U46619Agg40	U46619 concentration needed to reach 40% aggregation	Optimul (plate-based concentration range)	PRP (from sodium citrated blood)	U46619	0.005, 0.02, 0.10, 0.44, 1.98, 8.89 and 40 µM	↓ platelet reactivity
U46619aucMean	U46619 (AUC) across concentration range	Optimul (plate-based concentration range)	PRP (from sodium citrated blood)	U46619	0.005, 0.02, 0.10, 0.44, 1.98, 8.89 and 40 µM	↑ platelet reactivity
U46619ec50	U46619 concentration needed to reach 50% aggregation	Optimul (plate-based concentration range)	PRP (from sodium citrated blood)	U46619	0.005, 0.02, 0.10, 0.44, 1.98, 8.89 and 40 µM	↓ platelet reactivity
U46619ecMax	U46619 concentration needed to reach maximal aggregation	Optimul (plate-based concentration range)	PRP (from sodium citrated blood)	U46619	0.005, 0.02, 0.10, 0.44, 1.98, 8.89 and 40 µM	↓ platelet reactivity
U46619eMax	U46619 maximal % aggregation (Optimul)	Optimul (plate-based concentration range)	PRP (from sodium citrated blood)	U46619	0.005, 0.02, 0.10, 0.44, 1.98, 8.89 and 40 µM	↑ platelet reactivity
U46619slope	U46619 slope across concentration range	Optimul (plate-based concentration range)	PRP (from sodium citrated blood)	U46619	0.005, 0.02, 0.10, 0.44, 1.98, 8.89 and 40 µM	↑ platelet reactivity

## Sheet: S2.demographics_missing_dia_cal
Variable	with AbAo (N=1655)	without AbAo (N=1774)	P-Value
Sex (female)	763(46.1)	1079(60.82)	1.862e-17
Age (years)	58.88(5.98)	50.27(9.88)	2.51636e-119
Lipid Medications	544(32.89)	321(18.09)	5.55023e-20
Anti-hypertensive medications	572(34.58)	391(22.04)	1.80804e-13
Aspirin use	456(27.55)	280(15.78)	5.35226e-16
P2Y12 inhibitor use	22(1.33)	11(0.62)	0.0378
BMI (kg/m2)	28.93(5.8)	28.19(5.86)	0.000405286
Total Cholesterol (mg/dL)	190.73(36.89)	187.95(36.25)	0.0921239
HDL (mg/dL)	59.37(20.52)	59.58(18.34)	0.662714
Fasting glucose (mg/dL)	102.58(22.99)	97.97(19.08)	3.75276e-09
Smoking	99(5.99)	125(7.05)	0.179861
Type 2 diabetes	185(11.19)	121(6.82)	1.83593e-05
Variable	with CAC (N=1667)	without CAC (N=1762)	P-Value
Sex (female)	762(45.71)	1080(61.29)	2.20193e-19
Age (years)	58.84(5.94)	50.25(9.93)	4.45831e-119
Lipid Medications	546(32.77)	319(18.1)	8.9389e-20
Anti-hypertensive medications	577(34.63)	386(21.91)	5.18645e-14
Aspirin use	460(27.59)	276(15.66)	2.09594e-16
P2Y12 inhibitor use	19(1.14)	14(0.79)	0.302
BMI (kg/m2)	28.93(5.79)	28.19(5.87)	0.000464719
Total Cholesterol (mg/dL)	190.7(36.7)	187.96(36.43)	0.0922607
HDL (mg/dL)	59.31(20.41)	59.64(18.44)	0.449153
Fasting glucose (mg/dL)	102.65(23.12)	97.86(18.88)	3.81307e-10
Smoking	97(5.82)	127(7.21)	0.089525
Type 2 diabetes	186(11.16)	120(6.81)	1.75704e-05

## Sheet: S3.age_sex_aspirin_plt_calc
Platelet_Trait	Beta	SE	Z-Statistic	P-Value	N	Calcium_Trait
MPtrapAUC	0.181555	0.059028	3.07574	0.00209979	1418	AAS
ADPlow_PrimSlope	0.170929	0.0559827	3.05324	0.00226385	1538	CAC
Risto_FinAgg	0.191544	0.0647402	2.95866	0.00308978	1374	TAC
Risto_MaxAgg	0.18973	0.0645141	2.94091	0.0032725	1374	TAC
Risto_AUC.std	0.18561	0.0653043	2.84224	0.00447976	1373	TAC
MPtrapAgg	0.160759	0.0592697	2.71233	0.00668119	1418	AAS
MPtrapAUC	0.167806	0.06286	2.66951	0.00759613	1412	TAC
MPtrapVel	0.152577	0.0583321	2.61566	0.0089054	1418	AAS
MPtrapAgg	0.160568	0.0630617	2.54621	0.01089	1412	TAC
MPadpAUC	0.141687	0.0574468	2.4664	0.0136478	1418	AAS
ADPmid_PrimSlope	0.138559	0.0563582	2.45853	0.0139505	1624	CAC
MPtrapVel	0.151254	0.0621277	2.43457	0.0149095	1412	TAC
Epi10_PrimAgg	-0.139956	0.0575524	-2.43179	0.0150243	1392	AAS
ADPmid_FinAgg	0.124177	0.0518775	2.39365	0.0166815	1624	CAC
Epi10_SecAgg	0.104858	0.0442013	2.37229	0.0176783	1625	CAC
U46619ecMax	-0.12642	0.0535813	-2.35941	0.0183039	1477	CAC
Aa_FinAgg	0.0973461	0.0415509	2.34281	0.0191389	1625	CAC
FI_wb_PAC1%	-0.160293	0.0685705	-2.33764	0.0194057	1173	TAC
MPadpAgg	0.135802	0.0584286	2.32424	0.0201127	1418	AAS
ADPmid_MaxAgg	0.122837	0.0540108	2.2743	0.0229479	1624	CAC
U46619eMax	0.152555	0.0674835	2.26062	0.0237825	1265	TAC
RistoecMax	-0.116217	0.051432	-2.25963	0.0238442	1256	AAS
Epi10_PrimSlope	-0.120338	0.0538703	-2.23384	0.0254933	1392	AAS
Coll_AUC.std	0.11651	0.0524232	2.22249	0.0262503	1387	TAC
AAecMax	-0.110347	0.0508297	-2.17091	0.0299376	1179	AAS
ADPlow_PrimAgg	0.123634	0.0572926	2.15795	0.030932	1538	CAC
Risto_PrimSlope	0.136355	0.0634251	2.14986	0.0315666	1373	TAC
Aa_MaxAgg	0.0903566	0.0421433	2.14403	0.0320302	1625	CAC
Aa_PrimAgg	0.0903566	0.0421433	2.14403	0.0320302	1625	CAC
ADPmid_AUC.std	0.112823	0.0527166	2.14017	0.0323411	1624	CAC
MPadpVel	0.12024	0.0568117	2.11647	0.0343047	1418	AAS
Coll_PrimSlope	-0.106001	0.0500867	-2.11634	0.0343157	1393	AAS
Trap_PrimAgg	0.135953	0.0643189	2.11373	0.0345385	1383	TAC
Trap_PrimSlope	0.137604	0.0657296	2.09348	0.0363059	1383	TAC
Trap_AUC.std	0.13564	0.0650184	2.08618	0.0369626	1382	TAC
Risto_PrimAgg	0.13468	0.0650658	2.06991	0.0384611	1373	TAC
ADPecMax	0.0930873	0.0452479	2.05727	0.0396599	1518	CAC
ADPlow_MaxAgg	0.1136	0.0563574	2.01571	0.0438304	1538	CAC
Trap_AUC.std	0.119475	0.0614062	1.94564	0.0516975	1621	CAC
Trap_MaxAgg	0.117409	0.0603451	1.94562	0.0517006	1622	CAC
Epi10_SecSlp	0.0879733	0.0453325	1.94062	0.0523038	1625	CAC
Trap_FinAgg	0.115413	0.0603191	1.91337	0.0557012	1622	CAC
Trap_FinAgg	0.121129	0.0635421	1.90628	0.0566142	1383	TAC
FI_wb_PAC1Psel_DoublePos%	-0.130608	0.0687432	-1.89993	0.0574417	1173	TAC
Trap_MaxAgg	0.119938	0.0636753	1.88359	0.0596203	1383	TAC
Trap_PrimAgg	0.114313	0.0610546	1.87231	0.0611635	1622	CAC
MPtrapAUC	0.109252	0.0589897	1.85205	0.064019	1659	CAC
AA_AUC.std	0.0772322	0.0426839	1.8094	0.0703889	1624	CAC
FI_wb_PAC1%	-0.116946	0.0647052	-1.80736	0.0707057	1396	CAC
ADPmid_AUC.std	-0.0953113	0.0528545	-1.80328	0.071345	1389	AAS
MPristoAgg	0.0974675	0.0541977	1.79837	0.0721186	1409	AAS
CollecMax	0.0736899	0.041419	1.77913	0.0752177	1278	AAS
ADPmid_PrimAgg	0.0970061	0.0548288	1.76925	0.0768516	1624	CAC
Epi10_FinAgg	-0.0833027	0.0478374	-1.74137	0.081618	1392	AAS
ColleMax	0.103922	0.0597372	1.73965	0.0819211	1287	AAS
ADPmid_PrimAgg	-0.0952877	0.0548136	-1.73839	0.0821413	1389	AAS
ADPAgg20	0.101839	0.0595734	1.70948	0.0873625	1259	AAS
Epi10_MaxAgg	-0.0815163	0.04786	-1.70322	0.0885263	1392	AAS
MPtrapVel	0.0983132	0.0578185	1.70038	0.0890602	1659	CAC
Ristoslope	0.111334	0.065619	1.69667	0.0897588	1478	CAC
TRAP6aucMean	0.114728	0.0683549	1.67842	0.0932657	1115	AAS
ADPhigh_PrimSlope	0.106255	0.0634399	1.67489	0.0939553	1379	TAC
ADPhigh_DisAgg	-0.0523183	0.0313667	-1.66795	0.0953248	1385	AAS
MPcolAUC	0.0997231	0.0598892	1.66513	0.0958876	1412	TAC
Coll_FinAgg	0.105187	0.0633894	1.65937	0.097041	1387	TAC
ADPmid_MaxAgg	-0.0893657	0.0539672	-1.65593	0.0977367	1389	AAS
Coll_PrimAgg	0.103615	0.0632341	1.6386	0.101297	1387	TAC
Coll_MaxAgg	0.103654	0.0632587	1.63857	0.101304	1387	TAC
Epi10_AUC.std	-0.0779005	0.0479717	-1.62388	0.104401	1391	AAS
ADPlow_SecSlp	-0.0652906	0.0403787	-1.61696	0.105888	1303	AAS
TRAP6eMax	0.110684	0.068841	1.60782	0.107874	1115	AAS
FI_wb_PAC1Psel_DoublePos%	-0.100383	0.0636142	-1.57799	0.114567	1396	CAC
CollAgg20	0.0881899	0.0565178	1.56039	0.118667	1246	TAC
Trap_PrimSlope	0.0950528	0.0610437	1.55713	0.11944	1622	CAC
MPadpAUC	0.0906059	0.0588339	1.54003	0.123553	1660	CAC
AAslope	-0.10714	0.0697225	-1.53667	0.124375	1175	TAC
Coll_PrimSlope	0.0810817	0.0532181	1.52357	0.127615	1387	TAC
ADPmid_FinAgg	-0.0779581	0.0521628	-1.49451	0.135041	1389	AAS
ADPlow_AUC.std	0.0837805	0.0560636	1.49438	0.135076	1538	CAC
EpiecMax	-0.0700364	0.0480182	-1.45854	0.144692	1284	TAC
Risto_MaxAgg	0.087111	0.0602508	1.44581	0.148232	1613	CAC
MPadpAgg	0.0861345	0.0600095	1.43535	0.151188	1660	CAC
MPristoAUC	0.0734396	0.0516614	1.42156	0.155155	1409	AAS
ADPmid_PrimSlope	0.0856433	0.0603559	1.41897	0.155907	1383	TAC
MPtrapAgg	0.0834928	0.0594979	1.40329	0.160531	1659	CAC
RistoeMax	0.0906373	0.065284	1.38835	0.16503	1497	CAC
ADPec50	0.0783393	0.0565576	1.38512	0.166014	1508	CAC
ADPlow_SecSlp	0.0587659	0.0428447	1.3716	0.170187	1298	TAC
ADPlow_AUC.std	-0.0780957	0.0572813	-1.36337	0.172765	1303	AAS
ADPlow_PrimSlope	0.081581	0.0600148	1.35935	0.174037	1298	TAC
ADPeMax	0.0842164	0.0638842	1.31827	0.187414	1294	AAS
ADPmid_PrimSlope	-0.0748887	0.0571094	-1.31132	0.18975	1389	AAS
MPcolAgg	0.0725744	0.0555815	1.30573	0.191644	1418	AAS
Epi10_MaxAgg	0.0608496	0.046886	1.29782	0.19435	1625	CAC
ADPhigh_AUC.std	0.0696161	0.0537108	1.29613	0.194932	1615	CAC
Risto_AUC.std	0.0783829	0.060705	1.29121	0.196631	1612	CAC
TRAP6aucMean	0.0922516	0.0715777	1.28883	0.197456	1112	TAC
Coll_LagTim	0.0723635	0.0562035	1.28753	0.197911	1387	TAC
FI_wb_PSel%	-0.084942	0.0663946	-1.27935	0.200773	1173	TAC
MPaspiAgg	0.0581259	0.0455289	1.27668	0.201715	1360	AAS
ADPlow_MaxAgg	-0.0731756	0.0575363	-1.27182	0.203439	1303	AAS
AAaucMean	-0.0654206	0.0514716	-1.27101	0.203727	1179	AAS
Epi10_FinAgg	0.0595626	0.0469946	1.26744	0.205	1625	CAC
MPaspiAUC	0.0561854	0.0445835	1.26023	0.207587	1360	AAS
ADPmid_SecAgg	0.0519458	0.0415086	1.25145	0.210772	1624	CAC
RistoeMax	0.0858975	0.0689731	1.24538	0.212993	1267	TAC
U46619eMax	0.0794703	0.0638524	1.24459	0.213281	1270	AAS
Ristoslope	-0.0801899	0.0646197	-1.24095	0.214624	1255	AAS
Risto_FinAgg	0.0751352	0.0605488	1.2409	0.214641	1613	CAC
ADPslope	0.0791086	0.0637519	1.24088	0.21465	1518	CAC
AAeMax	0.0701818	0.0567406	1.23689	0.216128	1208	TAC
CollAgg40	0.0631949	0.0513043	1.23177	0.218037	1265	TAC
Risto_PrimAgg	0.073721	0.0602943	1.22269	0.221448	1612	CAC
Epi10_SecAgg	0.0547503	0.044956	1.21786	0.223276	1392	AAS
MPadpAUC	0.0741359	0.0612032	1.21131	0.225778	1412	TAC
MPcolAUC	0.0681776	0.0563202	1.21054	0.226073	1418	AAS
ADPaucMean	0.0695272	0.0577946	1.20301	0.228974	1292	AAS
Collslope	-0.0764175	0.0638019	-1.19773	0.231022	1492	CAC
MPadpVel	0.0722887	0.0604939	1.19498	0.232097	1412	TAC
FI_prp_PAC1_Psel_DoublePos%	0.0801876	0.0676459	1.1854	0.235858	1169	AAS
ADPhigh_PrimSlope	-0.0709151	0.059901	-1.18387	0.236463	1385	AAS
ADPhigh_MaxAgg	0.0620598	0.0524616	1.18296	0.236826	1617	CAC
Risto_DisAgg	-0.0596379	0.0504662	-1.18174	0.237309	1374	TAC
EpieMax	0.0710951	0.0602549	1.1799	0.238038	1294	AAS
U46619ecMax	-0.0618954	0.0525351	-1.17817	0.238728	1257	AAS
ADPlow_SecAgg	-0.0483585	0.0416045	-1.16234	0.245098	1303	AAS
Aa_PrimSlope	0.050093	0.0431343	1.16133	0.245509	1386	TAC
ADPlow_FinAgg	0.0641341	0.0552546	1.1607	0.245764	1538	CAC
MPaspiVel	0.0539089	0.0466902	1.15461	0.248251	1354	TAC
Aa_PrimSlope	0.0471563	0.0409712	1.15096	0.249747	1625	CAC
MPcolAgg	0.0678616	0.0591285	1.1477	0.251094	1412	TAC
ADPhigh_PrimSlope	0.0674512	0.0591751	1.13986	0.254345	1617	CAC
Aa_LagTim	0.0404161	0.0354697	1.13945	0.254514	1392	AAS
Epi10_PrimAgg	-0.0642131	0.0564305	-1.13791	0.255156	1625	CAC
ColleMax	0.0721971	0.0635733	1.13565	0.256103	1282	TAC
MPaspiAUC	0.0539244	0.0475185	1.13481	0.256456	1354	TAC
CollAgg20	0.0612731	0.0541815	1.13089	0.258103	1466	CAC
EpiAgg20	0.0712241	0.0632769	1.12559	0.260337	1262	TAC
FI_prp_PAC1_Psel_DoublePos%	-0.0798306	0.0710323	-1.12386	0.261071	1165	TAC
Epi10_PrimSlope	-0.0591446	0.052836	-1.1194	0.262969	1625	CAC
AAaucMean	-0.0586158	0.0528573	-1.10894	0.267455	1372	CAC
ADPslope	0.06752	0.0613877	1.09989	0.271379	1292	AAS
FI_prp_PAC1%	-0.0772589	0.0703139	-1.09877	0.271868	1165	TAC
ColleMax	0.0644356	0.0588767	1.09442	0.273772	1503	CAC
ADPhigh_FinAgg	0.0550261	0.0504752	1.09016	0.275642	1617	CAC
CollaucMean	0.0542465	0.0502417	1.07971	0.28027	1273	TAC
ADPAgg20	0.0653762	0.0611622	1.0689	0.285116	1480	CAC
AAslope	-0.0698977	0.0655787	-1.06586	0.286487	1177	AAS
ADPec50	0.061053	0.0584287	1.04491	0.296063	1278	TAC
MPadpVel	0.0608803	0.0583438	1.04348	0.296728	1660	CAC
Risto_DisAgg	-0.0496665	0.0475985	-1.04345	0.296742	1379	AAS
MPcolVel	0.0547439	0.052525	1.04224	0.297298	1418	AAS
RistoaucMean	0.066707	0.06437	1.0363	0.30006	1251	TAC
ADPmid_PrimAgg	0.0598239	0.0580581	1.03041	0.302815	1383	TAC
MPaspiVel	0.044721	0.043799	1.02105	0.307231	1360	AAS
Coll_MaxAgg	0.0602798	0.0591778	1.01862	0.308383	1626	CAC
Coll_PrimAgg	0.0602223	0.0591546	1.01805	0.308655	1626	CAC
MPadpAgg	0.0633469	0.0622418	1.01775	0.308795	1412	TAC
Coll_AUC.std	-0.0492119	0.0493801	-0.996592	0.318963	1393	AAS
AAAgg20	-0.0591546	0.0595626	-0.993151	0.320637	1099	AAS
ADPlow_FinAgg	-0.0556792	0.0562878	-0.989188	0.322571	1303	AAS
Coll_FinAgg	0.0581129	0.0593725	0.978785	0.327686	1626	CAC
Coll_LagTim	0.0524456	0.0536418	0.9777	0.328223	1626	CAC
FI_prp_PAC1%	0.0634107	0.0670196	0.946151	0.344072	1169	AAS
ADPAgg40	0.0524231	0.0559401	0.93713	0.348692	1280	AAS
Aa_MaxAgg	0.0413919	0.0444676	0.930831	0.351941	1386	TAC
Aa_PrimAgg	0.0413919	0.0444676	0.930831	0.351941	1386	TAC
ADPaucMean	0.0542721	0.0588889	0.921601	0.356737	1518	CAC
U46619slope	0.0607744	0.0659876	0.920998	0.357052	1251	TAC
Epislope	-0.0588321	0.0648508	-0.907192	0.364305	1284	TAC
Trap_PrimAgg	0.0547576	0.060731	0.901641	0.367247	1389	AAS
EpiAgg20	0.0532282	0.0593911	0.896231	0.370129	1267	AAS
U46619Agg20	0.0566912	0.0635317	0.892329	0.372217	1448	CAC
FI_prp_PAC1_Psel_DoublePos%	-0.0593901	0.0669252	-0.88741	0.374858	1379	CAC
U46619Agg20	0.0561355	0.0633499	0.886118	0.375554	1234	AAS
ADPhigh_PrimAgg	0.0467812	0.0529264	0.883891	0.376755	1617	CAC
MPcolVel	0.0477527	0.0544259	0.87739	0.380275	1660	CAC
ADPecMax	0.0388927	0.0444793	0.874399	0.381901	1292	AAS
Aa_LagTim	-0.0318894	0.0366801	-0.869391	0.384633	1625	CAC
ADPlow_MaxAgg	0.0528678	0.0608389	0.868981	0.384858	1298	TAC
Coll_FinAgg	-0.0517903	0.0597012	-0.867491	0.385673	1393	AAS
ADPAgg40	0.0496979	0.0574839	0.864553	0.387284	1505	CAC
U46619Agg20	0.057862	0.0671318	0.861915	0.388734	1229	TAC
Epi10_SecSlp	0.0389197	0.0453374	0.858445	0.390647	1392	AAS
MPaspiAgg	0.041511	0.0485284	0.855397	0.392331	1354	TAC
AAec50	-0.0520539	0.0613036	-0.849116	0.395817	1330	CAC
Epislope	-0.052604	0.0621876	-0.845892	0.397613	1512	CAC
Aa_FinAgg	0.0371529	0.0440877	0.842705	0.399394	1386	TAC
ADPmid_DisAgg	0.0339375	0.0404824	0.838326	0.401848	1624	CAC
Epi10_SecAgg	-0.0396711	0.0477757	-0.830362	0.406334	1386	TAC
CollecMax	-0.0342151	0.0412502	-0.829454	0.406848	1494	CAC
Trap_MaxAgg	0.0498668	0.0601365	0.829226	0.406976	1389	AAS
ADPlow_SecAgg	0.0362234	0.0441435	0.820583	0.411884	1298	TAC
EpiaucMean	0.0457763	0.0565416	0.809605	0.418167	1289	AAS
ADPmid_SecSlp	-0.034018	0.0421017	-0.807996	0.419093	1389	AAS
ADPmid_SecSlp	0.0332762	0.0415449	0.80097	0.423149	1624	CAC
Coll_MaxAgg	-0.0473175	0.0595839	-0.794132	0.427118	1393	AAS
Coll_PrimAgg	-0.0472988	0.0595607	-0.794127	0.427121	1393	AAS
Trap_AUC.std	0.0483631	0.061381	0.787917	0.430745	1388	AAS
Trap_FinAgg	0.0468944	0.0600164	0.78136	0.434591	1389	AAS
ADPlow_DisAgg	-0.0400331	0.0513514	-0.779592	0.435631	1538	CAC
Epi10_PrimAgg	0.0473553	0.0612312	0.773385	0.439295	1386	TAC
ADPhigh_PrimAgg	-0.0411581	0.0539725	-0.762575	0.445717	1385	AAS
AA_AUC.std	0.0339026	0.0447751	0.757175	0.448945	1386	TAC
FI_prp_PAC1%	-0.0502204	0.06634	-0.757015	0.449041	1379	CAC
ADPlow_DisAgg	-0.0414552	0.0548456	-0.755854	0.449737	1298	TAC
Aa_PrimSlope	-0.0306831	0.0406308	-0.755167	0.450149	1392	AAS
CollAgg40	0.0355693	0.0482696	0.736889	0.46119	1270	AAS
Collec50	0.0357889	0.0508585	0.703696	0.481622	1266	TAC
MPcolVel	0.0380113	0.0558284	0.68086	0.49596	1412	TAC
FI_wb_PSel%	-0.0416908	0.0621341	-0.670981	0.502232	1396	CAC
TRAP6eMax	0.0477747	0.0722015	0.661686	0.508172	1112	TAC
AAec50	-0.0387703	0.05948	-0.65182	0.514517	1142	AAS
Risto_PrimSlope	0.0387992	0.0597478	0.649384	0.51609	1378	AAS
Ristoec50	-0.0398693	0.0619452	-0.643622	0.519821	1462	CAC
TTAS_AUC	-0.0707705	0.110778	-0.638848	0.522922	315	TAC
ADPec50	0.0350097	0.0549822	0.636745	0.524291	1283	AAS
ADPeMax	0.0429898	0.0675507	0.636407	0.524511	1289	TAC
Risto_DisAgg	-0.0303121	0.0479112	-0.632674	0.526947	1613	CAC
EpiecMax	-0.0285514	0.0451578	-0.632258	0.527219	1289	AAS
U46619aucMean	0.0391641	0.0621452	0.630203	0.528562	1257	AAS
EpieMax	0.0404057	0.0641271	0.630088	0.528637	1289	TAC
MPristoAUC	0.0346086	0.0550922	0.628194	0.529877	1404	TAC
ADPlow_AUC.std	0.0374356	0.0605696	0.618059	0.536537	1298	TAC
AAAgg20	0.0375716	0.0629361	0.59698	0.550521	1097	TAC
Risto_PrimSlope	0.0347616	0.0582631	0.596631	0.550754	1612	CAC
ADPhigh_DisAgg	-0.0191892	0.0324767	-0.59086	0.554614	1617	CAC
FI_wb_PAC1%	-0.0383336	0.0654077	-0.586072	0.557827	1176	AAS
ADPhigh_DisAgg	-0.0194212	0.0333715	-0.581969	0.560588	1379	TAC
MPristoAgg	0.0334705	0.0577948	0.579126	0.562504	1404	TAC
AAslope	0.0380942	0.0660443	0.576799	0.564076	1371	CAC
Coll_AUC.std	0.0283113	0.0492561	0.574778	0.565442	1625	CAC
ADPhigh_AUC.std	-0.0310619	0.0541311	-0.573828	0.566084	1384	AAS
AAAgg20	-0.0343541	0.0598871	-0.573648	0.566206	1279	CAC
MPcolAgg	0.0323606	0.0564406	0.573357	0.566403	1660	CAC
ADPlow_PrimAgg	0.0347046	0.06141	0.56513	0.571986	1298	TAC
ADPAgg40	0.0334602	0.0593743	0.563546	0.573063	1275	TAC
Epislope	0.0338751	0.0608853	0.556375	0.577954	1289	AAS
ADPmid_SecAgg	-0.0239443	0.043946	-0.544856	0.585853	1383	TAC
Risto_FinAgg	-0.0328376	0.0610807	-0.53761	0.590846	1379	AAS
AAeMax	0.0287112	0.053468	0.536979	0.591282	1210	AAS
U46619slope	0.0340826	0.0636115	0.535793	0.592102	1475	CAC
CollAgg20	0.0283902	0.0530225	0.535437	0.592348	1251	AAS
Epi10_PrimSlope	0.0299949	0.0573333	0.523166	0.600858	1386	TAC
FI_prp_Psel%	0.0342258	0.0661123	0.517693	0.604673	1169	AAS
RistoAgg20	0.0339763	0.0657155	0.517021	0.605142	1414	CAC
ADPlow_DisAgg	0.0262388	0.0518601	0.505954	0.612889	1303	AAS
EpiAgg20	0.0306936	0.0613309	0.500458	0.616752	1488	CAC
EpiaucMean	0.0288387	0.0582509	0.495077	0.620546	1512	CAC
Epi10_SecSlp	-0.0237612	0.0481698	-0.49328	0.621815	1386	TAC
MPcolAUC	0.0277388	0.0566266	0.489854	0.624237	1660	CAC
AAAgg40	-0.0261092	0.0540926	-0.482676	0.629326	1127	AAS
TRAP6aucMean	0.0326835	0.0685177	0.477008	0.633356	1325	CAC
AAec50	0.029919	0.0632873	0.472748	0.636393	1140	TAC
RistoeMax	0.0303526	0.0651474	0.465906	0.641283	1272	AAS
TTAS_AUC	0.0501562	0.108713	0.461361	0.644539	417	CAC
EpiAgg40	0.0263524	0.0584788	0.450631	0.652255	1502	CAC
Aa_LagTim	0.016807	0.0375782	0.447253	0.654692	1386	TAC
MPristoVel	-0.0215379	0.0483073	-0.445853	0.655704	1650	CAC
RistoAgg40	0.0289126	0.0651571	0.443736	0.657233	1233	TAC
U46619aucMean	0.028948	0.0657084	0.440553	0.659537	1252	TAC
Collslope	0.0277008	0.0629686	0.439915	0.659998	1275	AAS
ADPhigh_MaxAgg	-0.0227641	0.0529237	-0.430131	0.6671	1385	AAS
ADPlow_SecSlp	0.0176078	0.0410578	0.428855	0.668029	1538	CAC
Coll_PrimSlope	0.0210391	0.0491414	0.428134	0.668553	1626	CAC
RistoecMax	-0.0230251	0.054207	-0.424763	0.67101	1480	CAC
ADPhigh_FinAgg	-0.0213334	0.0508795	-0.419292	0.675002	1385	AAS
ADPaucMean	0.0256294	0.0612865	0.41819	0.675808	1287	TAC
FI_wb_PAC1Psel_DoublePos%	-0.0274152	0.0656092	-0.417857	0.676052	1176	AAS
EpiaucMean	0.0243952	0.0603426	0.404278	0.686008	1284	TAC
RistoAgg40	-0.0253186	0.0626428	-0.404174	0.686085	1452	CAC
Epiec50	0.0235852	0.0585318	0.402946	0.686988	1502	CAC
MPristoAgg	0.0220864	0.0548541	0.402638	0.687214	1650	CAC
AAecMax	-0.0214327	0.0541931	-0.395488	0.692483	1177	TAC
Epi10_AUC.std	0.0186468	0.0473254	0.394012	0.693572	1623	CAC
Ristoec50	0.025212	0.0646859	0.38976	0.696714	1241	TAC
FI_prp_Psel%	-0.0264851	0.0694706	-0.381242	0.703024	1165	TAC
AAeMax	0.0208636	0.0548896	0.380102	0.70387	1412	CAC
ADPhigh_AUC.std	0.0212866	0.0574649	0.370427	0.711064	1378	TAC
Risto_MaxAgg	-0.0218976	0.0608805	-0.359682	0.719085	1379	AAS
Aa_FinAgg	-0.0147091	0.0415176	-0.354286	0.723124	1392	AAS
ADPmid_SecSlp	-0.0156544	0.0447625	-0.349721	0.726548	1383	TAC
ADPlow_SecAgg	0.0141724	0.0406989	0.348226	0.72767	1538	CAC
TTAS_AUC	0.0360188	0.10496	0.343168	0.731472	316	AAS
MPristoAUC	-0.017574	0.0524973	-0.334761	0.737805	1650	CAC
U46619Agg40	0.0203141	0.0621251	0.326986	0.743678	1242	AAS
ADPlow_PrimSlope	-0.0184625	0.0568348	-0.324845	0.745298	1303	AAS
AA_AUC.std	-0.0135041	0.0421636	-0.32028	0.748756	1392	AAS
CollaucMean	0.0153298	0.0480685	0.318916	0.74979	1494	CAC
ADPmid_AUC.std	0.0173617	0.0560504	0.309752	0.756749	1383	TAC
CollecMax	-0.0129506	0.0441085	-0.293606	0.769059	1273	TAC
ADPecMax	0.0134717	0.0472603	0.285053	0.775604	1287	TAC
MPristoVel	0.0136522	0.04804	0.284184	0.776269	1409	AAS
RistoAgg20	-0.0195811	0.0694224	-0.282058	0.777899	1203	TAC
Trap_PrimSlope	0.017398	0.0620254	0.280497	0.779096	1389	AAS
EpiAgg40	0.0158874	0.0567067	0.280167	0.779349	1281	AAS
ADPhigh_PrimAgg	0.0159086	0.0572829	0.27772	0.781227	1379	TAC
RistoAgg40	-0.0169819	0.0612508	-0.277252	0.781587	1238	AAS
FI_wb_PSel%	-0.0170302	0.0634469	-0.268417	0.788378	1176	AAS
AAAgg40	0.0152114	0.057618	0.264005	0.791776	1125	TAC
ADPlow_FinAgg	0.0154949	0.0595941	0.260007	0.794858	1298	TAC
TRAP6eMax	0.0176656	0.0686418	0.257359	0.796902	1325	CAC
MPaspiVel	-0.0102494	0.0438949	-0.233499	0.815374	1602	CAC
Epi10_AUC.std	0.011856	0.0510755	0.232126	0.81644	1385	TAC
RistoecMax	-0.0126422	0.0546667	-0.23126	0.817113	1251	TAC
AAaucMean	0.0121586	0.0547596	0.222036	0.824286	1177	TAC
Aa_MaxAgg	-0.00911213	0.0418768	-0.217594	0.827746	1392	AAS
Aa_PrimAgg	-0.00911213	0.0418768	-0.217594	0.827746	1392	AAS
Risto_AUC.std	-0.0133651	0.0616073	-0.21694	0.828255	1378	AAS
U46619slope	-0.0134206	0.0621498	-0.215939	0.829035	1256	AAS
ADPlow_PrimAgg	-0.0120985	0.0580824	-0.2083	0.834995	1303	AAS
U46619aucMean	0.0120729	0.0620534	0.194557	0.84574	1477	CAC
Collec50	0.00931315	0.0487954	0.190861	0.848634	1488	CAC
ADPmid_DisAgg	-0.00758219	0.0426309	-0.177857	0.858835	1383	TAC
Ristoec50	-0.0107671	0.0608259	-0.177014	0.859497	1246	AAS
U46619ec50	0.0107728	0.0617295	0.174515	0.86146	1246	AAS
RistoaucMean	0.00893087	0.0606402	0.147276	0.882914	1256	AAS
MPaspiAgg	0.00673212	0.0458725	0.146757	0.883324	1602	CAC
ADPhigh_FinAgg	-0.00769664	0.0540311	-0.142448	0.886726	1379	TAC
Collec50	0.00633973	0.0477473	0.132777	0.89437	1271	AAS
Epi10_MaxAgg	-0.00615976	0.0508823	-0.121059	0.903644	1386	TAC
ADPmid_MaxAgg	0.00688641	0.0572403	0.120307	0.90424	1383	TAC
ADPmid_SecAgg	-0.00473959	0.0413438	-0.114639	0.908732	1389	AAS
U46619Agg40	0.00704799	0.0624421	0.112872	0.910132	1460	CAC
Coll_LagTim	0.00561822	0.0530652	0.105874	0.915682	1393	AAS
AAecMax	-0.00546698	0.0520425	-0.105048	0.916337	1372	CAC
U46619ec50	-0.00676878	0.0654338	-0.103445	0.91761	1241	TAC
U46619ecMax	-0.00575374	0.0557396	-0.103225	0.917784	1252	TAC
Epi10_FinAgg	-0.00483963	0.0508538	-0.0951674	0.924182	1386	TAC
ADPslope	-0.00617301	0.0651969	-0.0946826	0.924567	1287	TAC
MPaspiAUC	0.00395041	0.044967	0.0878513	0.929995	1602	CAC
FI_prp_Psel%	-0.00582416	0.0665437	-0.0875239	0.930255	1379	CAC
ADPmid_DisAgg	-0.0033775	0.0402321	-0.0839502	0.933096	1389	AAS
AAAgg40	-0.00421459	0.0552757	-0.0762469	0.939223	1312	CAC
ADPhigh_MaxAgg	0.00346102	0.0561549	0.0616333	0.950855	1379	TAC
Epiec50	0.00373068	0.0608616	0.0612978	0.951122	1276	TAC
ADPeMax	0.00361648	0.0634022	0.0570402	0.954513	1520	CAC
MPristoVel	0.00276248	0.0511912	0.053964	0.956964	1404	TAC
U46619Agg40	0.00353479	0.0658415	0.0536864	0.957185	1237	TAC
RistoaucMean	0.00325117	0.0618016	0.0526065	0.958045	1480	CAC
EpiecMax	-0.00227216	0.0464811	-0.0488835	0.961012	1512	CAC
ADPAgg20	0.00302538	0.0633719	0.04774	0.961923	1254	TAC
EpiAgg40	-0.00219796	0.0605295	-0.0363122	0.971033	1276	TAC
CollaucMean	0.00114248	0.0472097	0.0242002	0.980693	1278	AAS
U46619eMax	0.00142511	0.0644991	0.022095	0.982372	1491	CAC
Risto_PrimAgg	-0.00115827	0.0612991	-0.0188954	0.984925	1378	AAS
ADPmid_FinAgg	0.00087361	0.0553497	0.0157835	0.987407	1383	TAC
Epiec50	0.000867651	0.0570166	0.0152175	0.987859	1281	AAS
Ristoslope	0.000942623	0.0687056	0.0137197	0.989054	1250	TAC
EpieMax	-0.000800722	0.0602435	-0.0132914	0.989395	1518	CAC
Collslope	0.000791135	0.0670252	0.0118035	0.990582	1270	TAC
U46619ec50	-0.000566641	0.0618841	-0.00915649	0.992694	1465	CAC
RistoAgg20	0.000549876	0.0652733	0.00842422	0.993279	1208	AAS
CollAgg40	-0.000315121	0.0489657	-0.00643555	0.994865	1488	CAC

## Sheet: S4.age_sex_aspirin_plt_diam
Platelet_Trait	Beta	SE	Z-Statistic	P-Value	N	Diameter_Trait
EpieMax	-0.0442419	0.0131766	-3.35762	0.000786161	1503	DAo
EpieMax	-0.0506458	0.0170465	-2.97104	0.00296794	1508	AbAo
EpiaucMean	-0.0345189	0.01276	-2.70525	0.00682528	1497	DAo
Risto_DisAgg	0.0355715	0.013486	2.63766	0.00834799	1601	AbAo
Collslope	-0.0443711	0.0177443	-2.50058	0.012399	1483	AbAo
EpiAgg40	-0.0316714	0.0128744	-2.46002	0.0138928	1487	DAo
ADPeMax	-0.0331533	0.0138959	-2.38584	0.0170401	1506	DAo
AAslope	-0.0332116	0.0143312	-2.31744	0.02048	1356	DAo
U46619aucMean	-0.0309685	0.0134762	-2.29801	0.0215612	1464	DAo
TRAP6aucMean	-0.0442974	0.0193369	-2.29082	0.0219736	1315	AbAo
U46619Agg40	-0.0310373	0.0135943	-2.28311	0.0224241	1445	DAo
U46619ecMax	0.0263108	0.0116214	2.26399	0.0235745	1464	DAo
AAecMax	0.0256775	0.0114045	2.25153	0.0243519	1357	DAo
U46619ec50	-0.0297973	0.0135113	-2.20537	0.0274285	1451	DAo
FI_wb_PAC1%	-0.0326565	0.0148126	-2.20465	0.0274787	1378	DAo
MPtrapAUC	0.0285912	0.0130695	2.18762	0.0286971	1641	DAo
Epiec50	-0.0280904	0.0128832	-2.18039	0.0292286	1487	DAo
Ristoec50	-0.0165748	0.00786937	-2.10624	0.0351834	1446	AAo
U46619ecMax	0.0144616	0.00688388	2.1008	0.0356589	1464	AAo
MPtrapAgg	0.0276947	0.0131878	2.10002	0.0357274	1641	DAo
TRAP6aucMean	-0.0305943	0.0148984	-2.05353	0.0400215	1312	DAo
MPtrapAgg	0.0159652	0.007816	2.04262	0.0410896	1641	AAo
MPtrapAUC	0.0156632	0.00774682	2.02189	0.0431875	1641	AAo
RistoecMax	0.0234957	0.0116527	2.01633	0.0437658	1464	DAo
RistoAgg40	-0.0156691	0.00800857	-1.95654	0.0504014	1436	AAo
FI_wb_PAC1Psel_DoublePos%	-0.0286456	0.0146731	-1.95226	0.0509075	1378	DAo
RistoecMax	0.0134215	0.00688635	1.94901	0.0512946	1464	AAo
TRAP6eMax	-0.0371749	0.0193488	-1.92131	0.0546932	1315	AbAo
FI_wb_PSel%	-0.0273793	0.0143795	-1.90405	0.0569043	1378	DAo
RistoecMax	0.0282804	0.015134	1.86867	0.0616687	1469	AbAo
Epiec50	-0.0307337	0.0166442	-1.84651	0.0648187	1492	AbAo
Risto_DisAgg	0.0190225	0.0103999	1.8291	0.0673845	1595	DAo
ADPhigh_PrimAgg	-0.0272982	0.0151308	-1.80415	0.0712078	1606	AbAo
EpiAgg40	-0.0299917	0.0166511	-1.80119	0.0716732	1492	AbAo
ADPhigh_AUC.std	-0.0277529	0.0154165	-1.80021	0.0718274	1604	AbAo
ADPhigh_PrimAgg	-0.0123225	0.00690292	-1.78511	0.0742441	1600	AAo
TRAP6eMax	-0.0265451	0.0149077	-1.78063	0.074973	1312	DAo
EpiaucMean	-0.0289461	0.0165284	-1.75129	0.0798955	1502	AbAo
ADPmid_SecAgg	-0.0161486	0.00925104	-1.7456	0.0808805	1606	DAo
ADPhigh_MaxAgg	-0.0260039	0.0150131	-1.73208	0.0832598	1606	AbAo
EpiAgg20	-0.0230637	0.0134354	-1.71663	0.086046	1472	DAo
Epi10_PrimSlope	-0.0119372	0.00695508	-1.71633	0.0861024	1607	AAo
ADPmid_SecSlp	-0.0157511	0.00921923	-1.7085	0.0875429	1606	DAo
ADPhigh_PrimSlope	-0.0284932	0.016867	-1.68928	0.0911652	1606	AbAo
ADPlow_DisAgg	-0.0112303	0.00667611	-1.68216	0.0925384	1522	AAo
ADPhigh_FinAgg	-0.0241675	0.014398	-1.67853	0.0932428	1606	AbAo
Aa_PrimSlope	-0.0192615	0.0116345	-1.65555	0.0978126	1613	AbAo
EpiAgg20	-0.0286715	0.0173283	-1.65461	0.0980045	1476	AbAo
MPadpAgg	0.0129867	0.00785404	1.65351	0.0982277	1642	AAo
U46619ec50	-0.0131252	0.00800696	-1.63922	0.101167	1451	AAo
MPtrapVel	0.0122219	0.00762276	1.60335	0.108858	1641	AAo
MPadpAUC	0.0122975	0.00773508	1.58983	0.111873	1642	AAo
Epislope	-0.0124268	0.00788874	-1.57526	0.115197	1497	AAo
TTAS_AUC	0.0366046	0.0232861	1.57195	0.115962	413	DAo
ADPeMax	-0.0282588	0.0180157	-1.56856	0.116751	1510	AbAo
U46619Agg40	-0.0125729	0.00805803	-1.56029	0.118691	1445	AAo
AAAgg20	-0.011878	0.00763696	-1.55533	0.119867	1264	AAo
RistoeMax	-0.0282829	0.0183453	-1.5417	0.123147	1486	AbAo
AAeMax	-0.0232627	0.0151264	-1.53789	0.124075	1399	AbAo
ADPAgg40	-0.0191139	0.0124485	-1.53544	0.124675	1490	DAo
MPtrapVel	0.0196976	0.012859	1.53182	0.125566	1641	DAo
Collslope	-0.0211042	0.0137844	-1.53102	0.125765	1478	DAo
ColleMax	-0.0196539	0.0129408	-1.51875	0.128825	1489	DAo
ADPaucMean	-0.0193782	0.0128511	-1.5079	0.13158	1504	DAo
U46619Agg20	-0.0205377	0.0138625	-1.48153	0.138465	1434	DAo
FI_prp_PAC1%	-0.0220034	0.0150955	-1.45761	0.144948	1360	DAo
ADPhigh_PrimAgg	-0.0168898	0.0116572	-1.44887	0.147374	1600	DAo
CollecMax	0.0127882	0.00902763	1.41656	0.156611	1480	DAo
Ristoslope	-0.0201066	0.014212	-1.41476	0.15714	1462	DAo
Epi10_SecAgg	0.00805999	0.00572824	1.40706	0.159409	1607	AAo
Risto_PrimAgg	-0.0110561	0.00790365	-1.39887	0.161853	1594	AAo
AAeMax	-0.0166362	0.0119008	-1.39792	0.162138	1396	DAo
U46619aucMean	-0.0108871	0.00798738	-1.36304	0.172869	1464	AAo
Epi10_AUC.std	-0.0183185	0.0135838	-1.34855	0.17748	1611	AbAo
AAecMax	0.0195452	0.014527	1.34544	0.178483	1360	AbAo
U46619Agg20	-0.0110223	0.00819774	-1.34456	0.178768	1434	AAo
ADPec50	-0.0162819	0.0122232	-1.33205	0.182844	1494	DAo
ADPmid_DisAgg	-0.0116683	0.00876232	-1.33165	0.182977	1606	DAo
Aa_LagTim	-0.0104341	0.00785357	-1.32858	0.183986	1607	DAo
TRAP6aucMean	-0.0115862	0.00881286	-1.31469	0.188615	1312	AAo
Trap_PrimSlope	-0.010485	0.00801902	-1.30751	0.191039	1604	AAo
MPcolAUC	-0.0159834	0.0124586	-1.28292	0.199521	1642	DAo
MPadpVel	0.00960764	0.00769261	1.24894	0.211686	1642	AAo
FI_wb_PAC1Psel_DoublePos%	-0.0105935	0.00849442	-1.24711	0.212357	1378	AAo
ADPslope	0.0170078	0.0136379	1.2471	0.212362	1504	DAo
Trap_PrimSlope	-0.016781	0.0134851	-1.24441	0.213349	1604	DAo
CollecMax	0.0145179	0.0116782	1.24316	0.213808	1485	AbAo
MPadpAUC	0.0210283	0.0169198	1.24282	0.213933	1648	AbAo
Epi10_PrimAgg	-0.00900336	0.00735459	-1.22418	0.220883	1607	AAo
RistoAgg20	-0.0101317	0.00833254	-1.21592	0.224014	1398	AAo
Epi10_FinAgg	-0.0161667	0.013351	-1.2109	0.225934	1613	AbAo
ADPecMax	0.0152484	0.0126838	1.20219	0.22929	1508	AbAo
ADPhigh_AUC.std	-0.00834656	0.00703386	-1.18663	0.235375	1598	AAo
Epiec50	-0.0090106	0.00760869	-1.18425	0.236314	1487	AAo
Epi10_MaxAgg	-0.0157196	0.01332	-1.18015	0.237942	1613	AbAo
Ristoslope	-0.0217679	0.0184605	-1.17916	0.238333	1467	AbAo
ADPaucMean	-0.0194885	0.0167479	-1.16364	0.244571	1508	AbAo
ADPhigh_MaxAgg	-0.00792271	0.0068566	-1.15549	0.247891	1600	AAo
ADPhigh_FinAgg	-0.0127327	0.0110797	-1.1492	0.250475	1600	DAo
AA_AUC.std	-0.0137901	0.0120685	-1.14265	0.253182	1612	AbAo
Risto_PrimSlope	-0.00887689	0.00778452	-1.14033	0.254151	1594	AAo
ADPecMax	0.0110546	0.00970764	1.13875	0.254807	1504	DAo
U46619eMax	-0.0203184	0.0178939	-1.13549	0.256169	1482	AbAo
Aa_LagTim	-0.0114611	0.0102127	-1.12224	0.261759	1613	AbAo
EpiaucMean	-0.00845431	0.00754388	-1.12068	0.262423	1497	AAo
ADPAgg20	-0.0193964	0.0174543	-1.11127	0.266451	1471	AbAo
ADPhigh_FinAgg	-0.00722721	0.00656283	-1.10123	0.270795	1600	AAo
MPaspiAgg	0.013866	0.0127825	1.08476	0.278026	1591	AbAo
ADPmid_FinAgg	-0.0161791	0.0149289	-1.08375	0.278478	1612	AbAo
ADPhigh_MaxAgg	-0.012499	0.0115724	-1.08007	0.280112	1600	DAo
MPadpVel	0.0181269	0.0168124	1.07819	0.280951	1648	AbAo
MPadpAgg	0.0185134	0.0171851	1.07729	0.281349	1648	AbAo
AAaucMean	-0.015914	0.0148048	-1.07492	0.282409	1360	AbAo
U46619slope	-0.0190287	0.0177049	-1.07477	0.282478	1467	AbAo
CollAgg40	-0.014656	0.0137656	-1.06469	0.287018	1479	AbAo
RistoeMax	-0.0150323	0.0141728	-1.06064	0.288852	1481	DAo
FI_prp_PAC1_Psel_DoublePos%	-0.0160308	0.015225	-1.05293	0.292374	1360	DAo
TRAP6eMax	-0.00891759	0.0088149	-1.01165	0.311706	1312	AAo
Epi10_PrimAgg	-0.0125196	0.012407	-1.00907	0.31294	1607	DAo
MPaspiAgg	0.00998607	0.00992485	1.00617	0.314334	1585	DAo
Epi10_PrimSlope	-0.0117959	0.0117236	-1.00617	0.314336	1607	DAo
Coll_FinAgg	0.0130616	0.0129905	1.00547	0.31467	1608	DAo
CollAgg40	-0.0106683	0.010683	-0.998629	0.317975	1474	DAo
ADPhigh_AUC.std	-0.0114168	0.0118618	-0.962481	0.335808	1598	DAo
AAslope	-0.00801078	0.0083499	-0.959387	0.337364	1356	AAo
AAec50	-0.00731624	0.00780692	-0.937149	0.348682	1314	AAo
ADPlow_SecAgg	-0.010655	0.0115129	-0.925487	0.354713	1528	AbAo
Epi10_AUC.std	-0.00964969	0.0104584	-0.922676	0.356176	1605	DAo
Epi10_PrimSlope	-0.0140218	0.0152289	-0.920737	0.357188	1613	AbAo
Risto_MaxAgg	-0.0157916	0.0172196	-0.917068	0.359107	1601	AbAo
ADPAgg20	-0.0122278	0.0133753	-0.914206	0.360608	1467	DAo
Epi10_FinAgg	0.00553326	0.00609685	0.90756	0.364111	1607	AAo
U46619Agg40	-0.0159294	0.0175695	-0.906653	0.364591	1450	AbAo
EpiAgg40	-0.00688959	0.00760909	-0.905441	0.365232	1487	AAo
Trap_PrimSlope	-0.0158121	0.0174713	-0.905031	0.365449	1610	AbAo
ADPmid_AUC.std	-0.0137946	0.0152467	-0.904764	0.365591	1612	AbAo
Collec50	-0.0123552	0.013706	-0.901448	0.36735	1479	AbAo
U46619slope	-0.00720896	0.00811532	-0.888316	0.374371	1462	AAo
ADPmid_DisAgg	-0.0100931	0.0113766	-0.887182	0.374981	1612	AbAo
Epi10_PrimAgg	-0.0140876	0.0160741	-0.876413	0.380806	1613	AbAo
ADPmid_MaxAgg	-0.013587	0.0155149	-0.875743	0.38117	1612	AbAo
AAAgg40	-0.0060949	0.0069873	-0.872282	0.383055	1296	AAo
AAecMax	0.0057963	0.00665005	0.871617	0.383417	1357	AAo
U46619ecMax	0.0129968	0.0150142	0.865629	0.386694	1469	AbAo
FI_prp_Psel%	-0.0129983	0.0150451	-0.863958	0.387611	1360	DAo
CollaucMean	-0.0116839	0.0135384	-0.863022	0.388125	1485	AbAo
Coll_PrimAgg	0.0110909	0.0129276	0.857919	0.390937	1608	DAo
Coll_MaxAgg	0.0110943	0.0129327	0.857848	0.390977	1608	DAo
Epi10_MaxAgg	0.00520284	0.00608194	0.855457	0.392298	1607	AAo
Epi10_SecAgg	0.0082604	0.00967497	0.853791	0.393221	1607	DAo
CollAgg20	0.00589801	0.00695079	0.848539	0.396138	1452	AAo
ADPhigh_DisAgg	-0.00344741	0.00409581	-0.841691	0.399961	1600	AAo
ColleMax	-0.0140668	0.0167217	-0.841226	0.400221	1494	AbAo
CollaucMean	-0.00878933	0.0104773	-0.838891	0.40153	1480	DAo
Risto_AUC.std	-0.00667344	0.00799184	-0.835032	0.4037	1594	AAo
RistoaucMean	-0.00656205	0.0078841	-0.832314	0.405232	1464	AAo
TTAS_AUC	0.0264889	0.0318359	0.832045	0.405384	417	AbAo
Risto_PrimAgg	-0.0142514	0.017202	-0.828474	0.407402	1600	AbAo
ADPlow_SecAgg	-0.00437036	0.00531713	-0.82194	0.411111	1522	AAo
MPaspiVel	0.0101393	0.0123483	0.821113	0.411582	1591	AbAo
Epislope	-0.0109215	0.0134206	-0.813786	0.415767	1497	DAo
Trap_FinAgg	0.0106796	0.0133099	0.80238	0.422333	1604	DAo
RistoAgg20	0.0145325	0.0181566	0.800399	0.42348	1403	AbAo
Aa_MaxAgg	0.00728283	0.00918512	0.792894	0.42784	1607	DAo
Aa_PrimAgg	0.00728283	0.00918512	0.792894	0.42784	1607	DAo
Coll_LagTim	-0.00899695	0.0115167	-0.781208	0.43468	1608	DAo
AAAgg20	-0.013038	0.0167278	-0.779421	0.435732	1267	AbAo
FI_wb_PSel%	0.0141662	0.0184463	0.767971	0.442505	1384	AbAo
ADPmid_FinAgg	-0.00879511	0.0114852	-0.76578	0.443807	1606	DAo
ADPAgg40	-0.0123771	0.0161787	-0.765024	0.444257	1495	AbAo
CollecMax	0.00405504	0.00533434	0.760176	0.447149	1480	AAo
FI_wb_PAC1%	-0.00640175	0.00858026	-0.746103	0.455605	1378	AAo
AAec50	-0.0128302	0.0171974	-0.746056	0.455633	1318	AbAo
ADPhigh_DisAgg	-0.00516085	0.00692589	-0.745154	0.456179	1600	DAo
Trap_MaxAgg	0.00988617	0.0133065	0.74296	0.457506	1604	DAo
ADPslope	0.0130292	0.0176853	0.736726	0.461289	1508	AbAo
Aa_FinAgg	0.00667168	0.00907787	0.734938	0.462377	1607	DAo
U46619ec50	-0.0127088	0.0174642	-0.727708	0.466792	1456	AbAo
ADPlow_SecSlp	-0.00390728	0.00541537	-0.721518	0.470591	1522	AAo
MPristoAUC	0.0106613	0.0150702	0.707444	0.47929	1638	AbAo
ADPecMax	-0.00405916	0.00574723	-0.706281	0.480014	1504	AAo
CollAgg20	-0.0105998	0.0151395	-0.700139	0.48384	1457	AbAo
Risto_FinAgg	-0.00557087	0.00796679	-0.699261	0.484389	1595	AAo
Risto_AUC.std	-0.0121263	0.0173713	-0.698066	0.485136	1600	AbAo
Coll_LagTim	-0.0104303	0.0149449	-0.69792	0.485227	1614	AbAo
ADPlow_FinAgg	-0.00511253	0.00733314	-0.697182	0.485689	1522	AAo
AAaucMean	-0.00463438	0.00679115	-0.682416	0.494976	1357	AAo
Aa_FinAgg	-0.00796169	0.0117686	-0.676521	0.49871	1613	AbAo
ADPslope	0.00533344	0.00807632	0.66038	0.50901	1504	AAo
MPaspiAgg	0.00384522	0.00583994	0.658435	0.510259	1585	AAo
ADPmid_AUC.std	-0.00769602	0.0117281	-0.656205	0.511692	1606	DAo
ADPlow_DisAgg	-0.00734407	0.011272	-0.651533	0.514702	1522	DAo
FI_prp_Psel%	0.0125101	0.0193005	0.648175	0.516872	1366	AbAo
RistoeMax	0.00540239	0.00839538	0.643496	0.519902	1481	AAo
Risto_MaxAgg	-0.00509845	0.00792914	-0.643001	0.520223	1595	AAo
U46619aucMean	-0.0110071	0.0174408	-0.631113	0.527967	1469	AbAo
ADPmid_MaxAgg	-0.00753214	0.0119522	-0.63019	0.52857	1606	DAo
CollAgg20	-0.00734555	0.0117142	-0.627065	0.530617	1452	DAo
ADPmid_PrimAgg	-0.00988037	0.0159306	-0.620213	0.535118	1612	AbAo
U46619Agg20	-0.0111216	0.017938	-0.620001	0.535257	1438	AbAo
Aa_MaxAgg	0.00335414	0.00543817	0.616777	0.537382	1607	AAo
Aa_PrimAgg	0.00335414	0.00543817	0.616777	0.537382	1607	AAo
ADPlow_SecSlp	-0.00723534	0.0117875	-0.613812	0.539339	1528	AbAo
U46619eMax	-0.00848295	0.0139121	-0.609753	0.542025	1477	DAo
Risto_FinAgg	-0.0104424	0.0173098	-0.603264	0.546333	1601	AbAo
Epi10_SecSlp	0.00348743	0.00579895	0.601389	0.547581	1607	AAo
MPristoAgg	0.00712798	0.0121619	0.58609	0.557815	1632	DAo
FI_wb_PSel%	-0.00486806	0.00832802	-0.58454	0.558857	1378	AAo
Aa_MaxAgg	-0.00695546	0.0119122	-0.583896	0.55929	1613	AbAo
Aa_PrimAgg	-0.00695546	0.0119122	-0.583896	0.55929	1613	AbAo
MPristoAUC	0.00667112	0.011638	0.573219	0.566496	1632	DAo
MPaspiAUC	0.00713421	0.012497	0.570873	0.568086	1591	AbAo
RistoAgg40	0.00987548	0.0174628	0.565515	0.571724	1441	AbAo
Trap_AUC.std	0.00765713	0.0135413	0.565466	0.571757	1603	DAo
Collec50	0.00354722	0.00627798	0.565025	0.572056	1474	AAo
ADPhigh_PrimSlope	-0.00725672	0.0130308	-0.55689	0.577602	1600	DAo
Risto_PrimSlope	-0.00723949	0.0130525	-0.554642	0.579139	1594	DAo
ADPmid_DisAgg	-0.0028176	0.00518786	-0.543115	0.587051	1606	AAo
EpiecMax	0.00551518	0.0101681	0.542398	0.587544	1497	DAo
ADPlow_MaxAgg	-0.00882015	0.0163527	-0.53937	0.589632	1528	AbAo
Aa_PrimSlope	-0.0048164	0.00897364	-0.536728	0.591456	1607	DAo
Risto_DisAgg	0.00328187	0.00620372	0.529017	0.596794	1595	AAo
Aa_FinAgg	0.00283594	0.00537491	0.527626	0.597759	1607	AAo
RistoAgg20	-0.00743001	0.0141382	-0.525526	0.599217	1398	DAo
FI_prp_Psel%	-0.00457954	0.00872551	-0.524845	0.599691	1360	AAo
MPcolVel	-0.00804536	0.0153398	-0.524478	0.599946	1648	AbAo
ADPlow_AUC.std	-0.0038298	0.00747121	-0.512607	0.608226	1522	AAo
Trap_PrimAgg	-0.00403855	0.00798105	-0.506018	0.612844	1604	AAo
FI_prp_PAC1_Psel_DoublePos%	-0.00444196	0.0088305	-0.503024	0.614947	1360	AAo
ADPmid_PrimSlope	-0.00823282	0.0163755	-0.502751	0.615139	1612	AbAo
ColleMax	-0.00379924	0.00765461	-0.496333	0.61966	1489	AAo
ADPhigh_PrimSlope	-0.00382378	0.00771728	-0.495482	0.62026	1600	AAo
MPristoVel	0.0068591	0.013895	0.493638	0.621562	1638	AbAo
EpieMax	-0.00379436	0.00779272	-0.48691	0.626322	1503	AAo
AAAgg40	-0.00743654	0.0153976	-0.482966	0.62912	1299	AbAo
Ristoec50	0.00825338	0.0172996	0.477086	0.633301	1451	AbAo
ADPeMax	-0.00382202	0.0082456	-0.463522	0.64299	1506	AAo
FI_prp_PAC1%	-0.00400628	0.00875901	-0.457389	0.647391	1360	AAo
ADPlow_AUC.std	-0.00726415	0.016378	-0.443531	0.657382	1528	AbAo
Ristoslope	-0.00368796	0.00839831	-0.439131	0.660567	1462	AAo
Epi10_SecSlp	0.00425667	0.00980108	0.434307	0.664066	1607	DAo
ADPhigh_DisAgg	-0.00393494	0.00906645	-0.434011	0.66428	1606	AbAo
ADPlow_MaxAgg	-0.0032403	0.00748156	-0.433105	0.664939	1522	AAo
MPaspiAUC	0.00417691	0.00971348	0.430012	0.667187	1585	DAo
ADPec50	-0.00309341	0.0072412	-0.427196	0.669237	1494	AAo
MPadpAUC	0.00554756	0.0130601	0.424773	0.671003	1642	DAo
EpiecMax	0.00552046	0.0130443	0.423209	0.672143	1502	AbAo
MPcolAgg	0.00307752	0.00727667	0.42293	0.672347	1642	AAo
AAslope	-0.00759993	0.01826	-0.416207	0.677259	1359	AbAo
ADPmid_SecAgg	-0.00227942	0.00548967	-0.41522	0.677981	1606	AAo
ADPlow_FinAgg	-0.00658204	0.0160417	-0.410308	0.68158	1528	AbAo
ADPec50	-0.00640662	0.0158891	-0.403209	0.686795	1499	AbAo
Aa_LagTim	-0.00186549	0.00465024	-0.40116	0.688303	1607	AAo
FI_prp_PAC1_Psel_DoublePos%	0.00712861	0.0195881	0.363926	0.715913	1366	AbAo
MPristoAUC	0.0024879	0.0069194	0.359555	0.71918	1632	AAo
Coll_AUC.std	-0.00228321	0.00636897	-0.358489	0.719977	1607	AAo
TTAS_AUC	-0.00473317	0.0132487	-0.357257	0.7209	413	AAo
Coll_LagTim	-0.00241397	0.00681471	-0.354229	0.723168	1608	AAo
MPadpAgg	0.00465872	0.0132643	0.351223	0.725421	1642	DAo
Trap_FinAgg	0.00603341	0.0172413	0.349939	0.726385	1610	AbAo
MPcolAgg	-0.00419593	0.0123134	-0.340761	0.733284	1642	DAo
Risto_PrimSlope	-0.005704	0.0169271	-0.336974	0.736137	1600	AbAo
FI_wb_PAC1Psel_DoublePos%	0.00629564	0.0188374	0.334209	0.738222	1384	AbAo
Epi10_SecSlp	-0.0042366	0.0126771	-0.334194	0.738233	1613	AbAo
Trap_MaxAgg	0.00566948	0.017236	0.328933	0.742207	1610	AbAo
AA_AUC.std	0.00177258	0.00551119	0.321632	0.747731	1606	AAo
ADPmid_SecSlp	-0.0016804	0.00547189	-0.307097	0.75877	1606	AAo
ADPAgg20	-0.00242692	0.00793031	-0.306032	0.759581	1467	AAo
Coll_PrimSlope	-0.00191888	0.00633978	-0.302672	0.76214	1608	AAo
ADPaucMean	-0.00230336	0.00761803	-0.302356	0.762381	1504	AAo
U46619eMax	-0.00246002	0.00824685	-0.298298	0.765476	1477	AAo
U46619slope	0.00406626	0.0137054	0.29669	0.766703	1462	DAo
AAAgg20	-0.00392015	0.0132332	-0.296236	0.76705	1264	DAo
AAeMax	-0.00197038	0.00699159	-0.281821	0.778081	1396	AAo
ADPlow_SecAgg	-0.00252166	0.00897222	-0.281052	0.77867	1522	DAo
ADPAgg40	-0.00205762	0.00736385	-0.279422	0.779921	1490	AAo
Epi10_FinAgg	-0.00286493	0.0102897	-0.278428	0.780684	1607	DAo
Risto_AUC.std	-0.00369715	0.013415	-0.275599	0.782856	1594	DAo
Trap_PrimAgg	0.00367408	0.0134369	0.273432	0.784521	1604	DAo
Collec50	-0.00289672	0.0106476	-0.272054	0.785581	1474	DAo
ADPlow_DisAgg	-0.00385335	0.0145379	-0.265055	0.790967	1528	AbAo
ADPmid_FinAgg	-0.00179142	0.0068096	-0.263073	0.792495	1606	AAo
Epi10_MaxAgg	-0.00264779	0.010264	-0.257968	0.796432	1607	DAo
EpiecMax	0.00151095	0.00598237	0.252567	0.800603	1497	AAo
Epi10_SecAgg	-0.00314397	0.0125367	-0.250781	0.801983	1613	AbAo
AA_AUC.std	0.00232062	0.00932234	0.248932	0.803414	1606	DAo
ADPmid_MaxAgg	-0.00172864	0.00708613	-0.243948	0.807271	1606	AAo
Trap_AUC.std	-0.00195702	0.00804479	-0.243266	0.807799	1603	AAo
Trap_AUC.std	0.00425303	0.017534	0.24256	0.808347	1609	AbAo
MPaspiVel	0.00218327	0.00959307	0.227588	0.819966	1585	DAo
MPcolAUC	0.00167335	0.00737442	0.226913	0.820491	1642	AAo
MPcolAUC	0.00350724	0.01614	0.217301	0.827974	1648	AbAo
ADPmid_AUC.std	-0.00150381	0.0069572	-0.216151	0.82887	1606	AAo
Coll_FinAgg	0.00349077	0.0167985	0.207803	0.835383	1614	AbAo
MPtrapVel	-0.00345029	0.0166552	-0.20716	0.835885	1647	AbAo
MPristoVel	0.00210337	0.0107275	0.196073	0.844553	1632	DAo
ADPmid_PrimAgg	0.00240287	0.0122688	0.195852	0.844726	1606	DAo
MPcolVel	-0.00222468	0.0118528	-0.187692	0.851118	1642	DAo
ADPlow_SecSlp	-0.00169936	0.00913081	-0.186112	0.852357	1522	DAo
EpiAgg20	0.0014289	0.00790264	0.180812	0.856515	1472	AAo
Trap_PrimAgg	0.00308474	0.0173982	0.177302	0.859271	1610	AbAo
Aa_PrimSlope	-0.000915688	0.00531631	-0.172241	0.863248	1607	AAo
ADPlow_PrimAgg	-0.00217588	0.0127178	-0.17109	0.864153	1522	DAo
ADPmid_SecAgg	-0.00203855	0.0119998	-0.169882	0.865103	1612	AbAo
MPristoVel	-0.00108214	0.00637998	-0.169615	0.865313	1632	AAo
Epislope	0.00290156	0.0172609	0.1681	0.866504	1502	AbAo
ADPlow_PrimSlope	-0.00202978	0.0125669	-0.161518	0.871685	1522	DAo
ADPlow_AUC.std	-0.00198738	0.0125778	-0.158007	0.874451	1522	DAo
MPaspiAUC	0.000872226	0.00571409	0.152645	0.878679	1585	AAo
MPcolAgg	0.00236013	0.0159423	0.148042	0.882309	1648	AbAo
MPaspiVel	0.00081691	0.00564994	0.144587	0.885037	1585	AAo
Collslope	0.00112156	0.00814178	0.137754	0.890435	1478	AAo
Risto_MaxAgg	-0.00178634	0.0133018	-0.134293	0.893171	1595	DAo
MPadpVel	-0.00172534	0.0129805	-0.132918	0.894258	1642	DAo
FI_wb_PAC1%	0.00251357	0.0190303	0.132083	0.894919	1384	AbAo
MPcolVel	0.000922429	0.00700285	0.131722	0.895204	1642	AAo
Epi10_AUC.std	-0.00079359	0.00621122	-0.127767	0.898333	1605	AAo
CollAgg40	0.00080036	0.00630484	0.126944	0.898985	1474	AAo
Coll_PrimSlope	0.0013386	0.0107136	0.124944	0.900568	1608	DAo
Trap_FinAgg	-0.000937178	0.00790866	-0.1185	0.905671	1604	AAo
MPristoAgg	0.000855977	0.00723146	0.118369	0.905776	1632	AAo
RistoAgg40	-0.00144007	0.0135406	-0.106352	0.915303	1436	DAo
Trap_MaxAgg	-0.000775607	0.0079063	-0.0980999	0.921853	1604	AAo
ADPlow_PrimAgg	0.00155482	0.016532	0.094049	0.92507	1528	AbAo
ADPmid_SecSlp	-0.00110034	0.0119399	-0.092157	0.926573	1612	AbAo
RistoaucMean	0.00151599	0.0173093	0.0875826	0.930208	1469	AbAo
AAaucMean	0.00100296	0.0116701	0.0859423	0.931512	1357	DAo
ADPlow_PrimSlope	0.000552822	0.00746469	0.0740583	0.940964	1522	AAo
ADPmid_PrimAgg	-0.000446099	0.00728	-0.0612772	0.951138	1606	AAo
RistoaucMean	0.000812523	0.0133454	0.0608841	0.951452	1464	DAo
ADPmid_PrimSlope	-0.000729566	0.012599	-0.0579067	0.953823	1606	DAo
Coll_PrimSlope	0.000800236	0.0139089	0.0575339	0.95412	1614	AbAo
Coll_MaxAgg	0.0008233	0.0167208	0.0492381	0.96073	1614	AbAo
Coll_PrimAgg	0.000820194	0.0167143	0.0490716	0.960862	1614	AbAo
Risto_PrimAgg	-0.000639802	0.0132791	-0.0481813	0.961572	1594	DAo
CollaucMean	0.000286764	0.00619868	0.0462621	0.963101	1480	AAo
AAAgg40	0.00054902	0.0120997	0.0453745	0.963809	1296	DAo
MPtrapAUC	-0.000736368	0.0169377	-0.0434751	0.965323	1647	AbAo
Coll_MaxAgg	0.000318904	0.00765475	0.0416609	0.966769	1608	AAo
Coll_PrimAgg	0.000314002	0.00765176	0.0410366	0.967267	1608	AAo
ADPlow_PrimSlope	-0.000593671	0.0163651	-0.0362768	0.971062	1528	AbAo
Coll_AUC.std	0.000462437	0.0139374	0.0331795	0.973531	1613	AbAo
ADPmid_PrimSlope	0.000241134	0.00747258	0.0322692	0.974257	1606	AAo
ADPlow_PrimAgg	-0.00023725	0.0075486	-0.0314296	0.974927	1522	AAo
ADPlow_MaxAgg	-0.000384441	0.0126028	-0.0305044	0.975665	1522	DAo
Risto_FinAgg	0.000391101	0.0133671	0.0292584	0.976658	1595	DAo
FI_prp_PAC1%	0.00056315	0.0194322	0.0289803	0.97688	1366	AbAo
ADPlow_FinAgg	-0.000263235	0.0123534	-0.0213087	0.982999	1522	DAo
Coll_FinAgg	9.369e-05	0.00769036	0.0121828	0.99028	1608	AAo
Coll_AUC.std	0.00012819	0.0107721	0.0119001	0.990505	1607	DAo
Ristoec50	0.00015069	0.0134005	0.0112451	0.991028	1446	DAo
MPtrapAgg	-0.000143845	0.0170878	-0.00841802	0.993283	1647	AbAo
AAec50	-9.07522e-05	0.0135235	-0.00671071	0.994646	1314	DAo
MPristoAgg	7.20126e-05	0.0157641	0.00456813	0.996355	1638	AbAo

## Sheet: S5.age_sex_aspirin_plt_tonom
Platelet_Trait	Beta	SE	Z-Statistic	P-Value	N	Tonometry_Trait
MPtrapVel	0.0041327	0.000814288	5.07523	3.8702e-07	3328	niCFPWV
MPtrapAUC	0.00379082	0.000827416	4.58152	4.61604e-06	3328	niCFPWV
ADPmid_DisAgg	-0.00274048	0.000600035	-4.5672	4.94278e-06	3069	niCFPWV
ADPlow_DisAgg	-0.00302182	0.000719296	-4.20107	2.65654e-05	3015	niCFPWV
Risto_FinAgg	0.0034556	0.000827582	4.17553	2.97292e-05	3216	niCFPWV
Risto_MaxAgg	0.00344036	0.000825487	4.16767	3.0773e-05	3216	niCFPWV
ADPlow_SecSlp	-0.00239879	0.00058609	-4.09286	4.26081e-05	3015	niCFPWV
Risto_AUC.std	0.00321283	0.000833495	3.85465	0.000115895	3215	niCFPWV
MPtrapAgg	0.00314119	0.000831564	3.77744	0.000158446	3328	niCFPWV
ADPlow_SecAgg	-0.00221815	0.000588309	-3.77038	0.000162996	3015	niCFPWV
EpiAgg40	-0.00310356	0.000841921	-3.68628	0.000227558	2968	niCFPWV
EpiaucMean	-0.00305426	0.000837895	-3.64516	0.000267226	2991	niCFPWV
ADPhigh_DisAgg	-0.00155391	0.000427563	-3.63434	0.000278697	3246	niCFPWV
Risto_PrimAgg	0.00290906	0.000820348	3.54613	0.000390933	3215	niCFPWV
EpiecMax	-0.00229664	0.000650167	-3.53238	0.000411829	2991	niCFPWV
ADPlow_FinAgg	-0.00279545	0.000798191	-3.50223	0.000461379	3015	niCFPWV
Epi10_PrimSlope	-0.0026936	0.000781763	-3.44555	0.000569902	3254	niCFPWV
Epiec50	-0.00290653	0.000852161	-3.41077	0.000647792	2969	niCFPWV
Trap_FinAgg	0.00266674	0.000825398	3.23086	0.00123419	3252	niCFPWV
Trap_MaxAgg	0.00265768	0.000823206	3.22845	0.00124463	3252	niCFPWV
Trap_AUC.std	0.00267144	0.000836608	3.19318	0.00140713	3251	niCFPWV
Trap_PrimAgg	0.00256563	0.000824511	3.11169	0.00186017	3252	niCFPWV
ADPlow_AUC.std	-0.00252462	0.000816113	-3.09346	0.00197836	3015	niCFPWV
Epi10_PrimAgg	-0.00247913	0.000809326	-3.06321	0.00218978	3254	niCFPWV
MPcolAUC	0.000704163	0.000232433	3.02953	0.00244936	3341	Zc
ADPlow_PrimAgg	0.00332127	0.00110898	2.99488	0.00274551	3024	CPP
MPadpVel	0.00233722	0.000789117	2.96182	0.00305829	3328	niCFPWV
Ristoec50	-0.00235511	0.00082923	-2.84012	0.00450971	2913	niCFPWV
Epi10_AUC.std	-0.00187704	0.000668283	-2.80875	0.00497337	3252	niCFPWV
Epi10_SecAgg	0.00176876	0.000640947	2.75961	0.0057871	3254	niCFPWV
MPadpAUC	0.00216056	0.000796862	2.71133	0.00670133	3328	niCFPWV
ADPlow_PrimSlope	0.00287575	0.00107822	2.66712	0.00765036	3024	CPP
RistoAgg40	-0.00219926	0.000835063	-2.63364	0.00844741	2896	niCFPWV
EpiAgg20	-0.00226939	0.000870384	-2.60734	0.00912478	2940	niCFPWV
Epislope	-0.00222401	0.000864208	-2.57346	0.0100687	2990	niCFPWV
ADPec50	-0.00224033	0.000871149	-2.57169	0.0101203	2966	niCFPWV
RistoeMax	0.00221142	0.000878214	2.51809	0.0117993	2971	niCFPWV
EpieMax	-0.00208445	0.000840446	-2.48016	0.0131322	3009	niCFPWV
Risto_PrimSlope	-0.00277582	0.00114434	-2.42569	0.0152792	3228	CPP
Coll_PrimSlope	-0.000516504	0.00021371	-2.41684	0.015656	3268	Zc
MPcolVel	0.00180018	0.000757071	2.37783	0.0174151	3329	niCFPWV
U46619eMax	-0.00207709	0.000879107	-2.36273	0.0181409	2985	niCFPWV
Collec50	-0.00201668	0.000857952	-2.35057	0.0187445	2930	niCFPWV
ADPAgg40	-0.00202723	0.000871385	-2.32645	0.0199945	2961	niCFPWV
U46619ec50	-0.00203954	0.000879951	-2.31779	0.0204609	2928	niCFPWV
MPaspiAgg	0.00146966	0.000636289	2.30974	0.0209027	3190	niCFPWV
U46619Agg40	-0.00201885	0.000881104	-2.29128	0.0219473	2921	niCFPWV
MPcolVel	0.000520653	0.000227269	2.29091	0.0219688	3341	Zc
ADPlow_MaxAgg	-0.00186108	0.000813545	-2.28761	0.02216	3015	niCFPWV
Aa_FinAgg	0.00131828	0.00057812	2.28028	0.022591	3247	niCFPWV
TRAP6aucMean	0.00210399	0.000925628	2.27304	0.023024	2688	niCFPWV
FI_wb_PSel%	-0.00196025	0.000876342	-2.23686	0.0252958	2789	niCFPWV
Epi10_SecSlp	0.00196686	0.000890849	2.20785	0.0272547	3267	CPP
MPristoAgg	0.00167422	0.000760035	2.20282	0.0276075	3289	niCFPWV
MPaspiVel	0.00135716	0.000626911	2.16484	0.0303998	3190	niCFPWV
MPaspiAUC	0.00137034	0.000633676	2.16253	0.0305772	3190	niCFPWV
ADPmid_AUC.std	-0.00167993	0.000778669	-2.15743	0.0309718	3069	niCFPWV
ADPmid_FinAgg	-0.0016487	0.000771948	-2.13576	0.0326988	3069	niCFPWV
TRAP6eMax	0.00196771	0.000926038	2.12487	0.0335974	2688	niCFPWV
EpieMax	0.000521284	0.000249777	2.087	0.036888	3018	Zc
MPadpAgg	0.00169267	0.000811081	2.08693	0.0368948	3328	niCFPWV
MPcolAgg	0.000485074	0.000233069	2.08125	0.0374112	3341	Zc
Risto_PrimSlope	0.00172035	0.000829199	2.07472	0.0380129	3215	niCFPWV
Aa_MaxAgg	0.00117364	0.000583118	2.0127	0.0441466	3247	niCFPWV
Aa_PrimAgg	0.00117364	0.000583118	2.0127	0.0441466	3247	niCFPWV
ADPlow_PrimAgg	0.000466389	0.000241066	1.9347	0.0530274	3024	Zc
Coll_LagTim	-0.00135108	0.000701251	-1.92667	0.0540205	3256	niCFPWV
U46619Agg40	-0.000497508	0.000261913	-1.89952	0.0574966	2925	Zc
AAecMax	-0.00131984	0.000707172	-1.86636	0.0619906	2780	niCFPWV
EpiaucMean	0.00045975	0.000247969	1.85406	0.0637301	3000	Zc
U46619ecMax	-0.00190293	0.00102873	-1.84979	0.0643437	2962	CPP
AAAgg40	0.000407479	0.000221072	1.84319	0.0653007	2662	Zc
ADPaucMean	-0.00156182	0.000868947	-1.79737	0.0722762	2988	niCFPWV
RistoaucMean	-0.00149629	0.00083432	-1.79342	0.0729056	2943	niCFPWV
Epi10_SecAgg	0.00159217	0.000893032	1.78288	0.0746065	3267	CPP
Coll_PrimAgg	0.0014263	0.000808043	1.76512	0.0775432	3256	niCFPWV
Epi10_SecSlp	0.001124	0.000639954	1.75638	0.0790237	3254	niCFPWV
Coll_MaxAgg	0.00141812	0.000807933	1.75524	0.0792181	3256	niCFPWV
ADPlow_SecAgg	-0.00140909	0.000807464	-1.74508	0.080971	3024	CPP
U46619ec50	-0.000449365	0.000261762	-1.71669	0.0860353	2932	Zc
AAAgg20	-0.00137474	0.000801842	-1.71447	0.0864419	2578	niCFPWV
MPristoAUC	0.00123963	0.000728538	1.70153	0.0888426	3289	niCFPWV
CollAgg40	-0.00144185	0.000849867	-1.69656	0.0897795	2927	niCFPWV
ADPlow_SecSlp	-0.00136131	0.000803372	-1.6945	0.0901703	3024	CPP
Trap_PrimAgg	0.000420506	0.000248578	1.69164	0.0907139	3265	Zc
CollecMax	-0.00105573	0.00063121	-1.67255	0.0944162	2945	niCFPWV
CollaucMean	-0.00139314	0.000847915	-1.64302	0.100379	2945	niCFPWV
AAaucMean	-0.001188	0.000727813	-1.63228	0.10262	2780	niCFPWV
RistoAgg20	-0.00140324	0.000867726	-1.61714	0.105848	2824	niCFPWV
AAAgg40	-0.00119195	0.000737828	-1.61548	0.106207	2656	niCFPWV
Aa_LagTim	0.00106047	0.000662158	1.60153	0.109259	3260	CPP
EpiAgg20	0.000410267	0.000257611	1.59258	0.111254	2947	Zc
AAec50	-0.00128002	0.000816854	-1.56701	0.117113	2689	niCFPWV
Trap_PrimSlope	0.00130386	0.000832667	1.56589	0.117375	3252	niCFPWV
ADPmid_PrimSlope	0.00171382	0.00109462	1.56567	0.117425	3079	CPP
Epi10_PrimAgg	-0.00174009	0.00112205	-1.55082	0.120946	3267	CPP
Aa_LagTim	0.000222295	0.000143953	1.54422	0.122535	3260	Zc
Risto_DisAgg	-0.00101323	0.00066168	-1.5313	0.125696	3216	niCFPWV
MPtrapVel	0.0017053	0.0011263	1.51407	0.130009	3340	CPP
AA_AUC.std	0.000887706	0.000589614	1.50557	0.132177	3244	niCFPWV
EpiecMax	-0.00134123	0.000894087	-1.50011	0.133586	3000	CPP
RistoAgg20	0.00178331	0.00120091	1.48496	0.137554	2828	CPP
MPcolAUC	0.00158974	0.00107363	1.48072	0.138682	3341	CPP
TRAP6aucMean	0.00040591	0.00027561	1.47277	0.140813	2699	Zc
AAec50	0.000358457	0.000245754	1.4586	0.144675	2696	Zc
U46619aucMean	-0.00127616	0.00087891	-1.45198	0.146507	2957	niCFPWV
Coll_FinAgg	0.00120194	0.000834518	1.44029	0.149787	3078	niCFPWV
ADPlow_PrimSlope	0.000335205	0.000234352	1.43034	0.152618	3024	Zc
EpiAgg40	0.000354575	0.000248832	1.42496	0.15417	2976	Zc
Epi10_SecSlp	0.000276056	0.000193803	1.42441	0.154327	3267	Zc
MPristoVel	0.000971441	0.000682338	1.42369	0.154535	3289	niCFPWV
U46619Agg20	-0.00126363	0.000891216	-1.41787	0.156227	2897	niCFPWV
MPadpVel	0.000334438	0.000236019	1.417	0.156484	3340	Zc
ADPmid_PrimAgg	-0.00111799	0.000797441	-1.40197	0.160925	3069	niCFPWV
MPtrapVel	0.000340758	0.000244163	1.39562	0.16283	3340	Zc
CollAgg20	-0.00119424	0.000875743	-1.36369	0.172665	2888	niCFPWV
ADPlow_SecSlp	-0.000236839	0.000174547	-1.35688	0.17482	3024	Zc
Risto_PrimSlope	-0.000333956	0.0002485	-1.34389	0.178984	3228	Zc
U46619aucMean	-0.000348891	0.000261067	-1.33641	0.181417	2962	Zc
Epi10_SecAgg	0.000256446	0.000194236	1.32028	0.186742	3267	Zc
MPadpAUC	0.000313944	0.000238444	1.31664	0.18796	3340	Zc
ADPlow_SecAgg	-0.000230396	0.000175476	-1.31298	0.189189	3024	Zc
MPristoAgg	-0.000296064	0.00022758	-1.30092	0.193286	3301	Zc
AAAgg20	0.000311426	0.000240126	1.29693	0.194655	2584	Zc
MPtrapAUC	0.00147283	0.00114521	1.28608	0.198414	3340	CPP
ADPhigh_PrimAgg	0.000290878	0.00022629	1.28542	0.198646	3079	Zc
Coll_LagTim	0.00124402	0.000976925	1.2734	0.202874	3268	CPP
MPristoAUC	-0.000276667	0.000217914	-1.26961	0.204222	3301	Zc
Coll_FinAgg	0.000314116	0.000249364	1.25967	0.207789	3088	Zc
U46619slope	0.000328356	0.000261787	1.25429	0.209738	2956	Zc
U46619Agg20	-0.000331025	0.00026484	-1.24991	0.211333	2901	Zc
Trap_FinAgg	0.000306754	0.000248813	1.23287	0.217624	3265	Zc
AAaucMean	0.000268698	0.000218266	1.23106	0.2183	2787	Zc
Trap_MaxAgg	0.000304081	0.000248173	1.22528	0.220471	3265	Zc
U46619ecMax	-0.000271183	0.000222643	-1.21802	0.223218	2962	Zc
ADPhigh_FinAgg	0.000255174	0.000209629	1.21727	0.223503	3259	Zc
CollAgg20	-0.00145748	0.00119948	-1.21509	0.224333	2896	CPP
TTAS_AUC	-0.00225989	0.00186631	-1.21088	0.22594	1089	CPP
Trap_AUC.std	0.000304823	0.000252048	1.20939	0.226514	3264	Zc
Collslope	-0.000303799	0.00025945	-1.17094	0.241624	2948	Zc
Epiec50	0.000292622	0.000251754	1.16233	0.245101	2977	Zc
ADPhigh_DisAgg	0.000150244	0.000129717	1.15824	0.246765	3259	Zc
U46619ecMax	-0.000836384	0.000746532	-1.12036	0.262561	2957	niCFPWV
FI_wb_PAC1%	0.00136259	0.00123614	1.1023	0.270333	2798	CPP
ADPmid_PrimSlope	0.000260811	0.000237771	1.0969	0.272685	3079	Zc
FI_prp_Psel%	0.000300336	0.000275489	1.09019	0.275628	2764	Zc
ADPecMax	0.00093344	0.000861099	1.08401	0.27836	2995	CPP
TRAP6eMax	-0.00135241	0.00127526	-1.06049	0.28892	2699	CPP
ADPhigh_FinAgg	-0.000733147	0.000694323	-1.05592	0.291006	3246	niCFPWV
ADPhigh_MaxAgg	0.000223376	0.000217447	1.02727	0.304295	3259	Zc
ADPmid_MaxAgg	-0.00080797	0.000786711	-1.02702	0.30441	3069	niCFPWV
FI_prp_Psel%	-0.000927202	0.000904976	-1.02456	0.305571	2753	niCFPWV
ADPmid_MaxAgg	0.00109936	0.00107577	1.02192	0.306817	3079	CPP
Epislope	-0.00119226	0.00118864	-1.00305	0.315837	2999	CPP
ADPhigh_AUC.std	0.000222599	0.00022205	1.00247	0.316116	3257	Zc
AAslope	0.00117824	0.00119581	0.985306	0.324474	2784	CPP
ADPmid_PrimAgg	0.000231448	0.000236229	0.979758	0.327206	3079	Zc
ADPmid_SecSlp	-0.000616786	0.000633696	-0.973316	0.330396	3069	niCFPWV
ADPmid_DisAgg	-0.000174695	0.000179855	-0.971311	0.331393	3079	Zc
MPcolAgg	0.00103799	0.00107552	0.965102	0.334494	3341	CPP
Ristoslope	0.000845091	0.000884973	0.954934	0.339611	2939	niCFPWV
Collslope	-0.000825365	0.000867546	-0.95138	0.341412	2940	niCFPWV
Coll_MaxAgg	0.000229724	0.000243786	0.942317	0.34603	3269	Zc
ColleMax	-0.00107398	0.00113982	-0.942236	0.346072	2973	CPP
CollAgg40	-0.00107962	0.00116006	-0.930653	0.352033	2935	CPP
Coll_PrimAgg	0.000226438	0.000243783	0.928848	0.352968	3268	Zc
MPaspiAgg	-0.000175781	0.000191008	-0.92028	0.357426	3202	Zc
U46619Agg40	-0.00110635	0.00121025	-0.914146	0.36064	2925	CPP
Aa_PrimSlope	0.000158684	0.000173726	0.913415	0.361024	3260	Zc
Epi10_PrimSlope	-0.000965338	0.00108038	-0.89352	0.371579	3267	CPP
FI_prp_Psel%	0.00110917	0.00124499	0.890908	0.372979	2764	CPP
Coll_PrimSlope	0.000624148	0.000707718	0.881916	0.377822	3256	niCFPWV
ADPmid_SecSlp	-0.000165999	0.000188313	-0.881506	0.378044	3079	Zc
AAecMax	0.000843627	0.0009723	0.867662	0.385579	2787	CPP
MPadpAgg	0.000210293	0.000242988	0.865446	0.386794	3340	Zc
EpiAgg20	0.00101841	0.00118967	0.856043	0.391974	2947	CPP
U46619slope	0.000749479	0.000879892	0.851786	0.394333	2951	niCFPWV
ADPmid_SecAgg	0.000734648	0.000866744	0.847596	0.396663	3079	CPP
RistoecMax	-0.000618149	0.000732828	-0.843511	0.398943	2943	niCFPWV
MPristoVel	-0.000169423	0.000204316	-0.82922	0.40698	3301	Zc
Collec50	-0.00096471	0.00117247	-0.822801	0.410621	2938	CPP
Epi10_PrimSlope	-0.000192568	0.000234416	-0.82148	0.411373	3267	Zc
RistoAgg20	0.000212223	0.000259686	0.817228	0.413798	2828	Zc
ADPhigh_PrimSlope	0.000929997	0.00114104	0.815043	0.415048	3079	CPP
Coll_PrimSlope	-0.000800435	0.000984291	-0.81321	0.416097	3268	CPP
ADPAgg20	0.000963527	0.00120063	0.802515	0.422255	2932	CPP
ADPlow_AUC.std	0.000895085	0.0011158	0.802193	0.422442	3024	CPP
AAeMax	0.000571551	0.000715379	0.798948	0.42432	2838	niCFPWV
U46619ec50	-0.000950315	0.00120962	-0.785632	0.432083	2932	CPP
ADPlow_MaxAgg	0.000871929	0.00111181	0.784243	0.432898	3024	CPP
Risto_MaxAgg	0.000194725	0.000248747	0.782826	0.433729	3229	Zc
Risto_MaxAgg	0.000881599	0.00114545	0.769653	0.441506	3229	CPP
Trap_PrimSlope	0.000190235	0.000250889	0.758243	0.448305	3265	Zc
MPcolAgg	0.00058816	0.000777373	0.7566	0.449289	3329	niCFPWV
AAAgg40	0.000752314	0.00101118	0.743995	0.45688	2662	CPP
ADPhigh_AUC.std	-0.000544737	0.000736897	-0.739231	0.459767	3244	niCFPWV
ADPmid_AUC.std	0.000773336	0.00106425	0.726649	0.467441	3079	CPP
ADPeMax	0.000188009	0.000260802	0.720888	0.470978	3007	Zc
ADPhigh_PrimSlope	0.000176433	0.000248218	0.710797	0.47721	3079	Zc
Risto_FinAgg	0.000815859	0.00114821	0.710546	0.477365	3229	CPP
Epi10_PrimAgg	-0.000172556	0.0002438	-0.707778	0.479083	3267	Zc
CollaucMean	-0.000818082	0.00115884	-0.705947	0.480221	2953	CPP
TTAS_AUC	-0.00030704	0.000437308	-0.702114	0.482608	1089	Zc
FI_wb_PSel%	0.000185916	0.000266589	0.697386	0.485561	2798	Zc
Risto_FinAgg	0.000170918	0.000249344	0.68547	0.493048	3229	Zc
Risto_PrimAgg	0.000168922	0.000247135	0.683522	0.494277	3228	Zc
ADPmid_SecAgg	-0.000127399	0.000188305	-0.676555	0.498689	3079	Zc
Epislope	0.000174273	0.000257737	0.676167	0.498935	2999	Zc
TRAP6eMax	0.000182408	0.000276138	0.660568	0.508889	2699	Zc
ADPmid_MaxAgg	0.000153954	0.000233672	0.658845	0.509995	3079	Zc
CollecMax	0.000564433	0.000863047	0.654	0.513112	2953	CPP
ADPmid_PrimAgg	0.00070808	0.00108797	0.65083	0.515156	3079	CPP
MPaspiAUC	-0.000123179	0.000189754	-0.649153	0.51624	3202	Zc
Collslope	-0.000766487	0.00119109	-0.643516	0.51989	2948	CPP
ADPhigh_PrimSlope	-0.000535703	0.000832996	-0.643104	0.520156	3069	niCFPWV
FI_prp_PAC1_Psel_DoublePos%	0.000803651	0.0012574	0.639138	0.522733	2764	CPP
MPcolVel	0.000668465	0.00104886	0.637327	0.523912	3341	CPP
ColleMax	0.00052805	0.000833477	0.633551	0.526374	2964	niCFPWV
ADPmid_FinAgg	0.000666124	0.0010566	0.630443	0.528405	3079	CPP
Aa_LagTim	0.000298733	0.000475606	0.62811	0.529932	3247	niCFPWV
AAeMax	-0.000614289	0.000980901	-0.62625	0.531151	2846	CPP
ADPec50	0.000729948	0.00118539	0.615787	0.538035	2973	CPP
ADPmid_SecSlp	0.000533796	0.00086697	0.615702	0.538091	3079	CPP
EpieMax	0.000708148	0.00115241	0.614492	0.53889	3018	CPP
CollAgg20	-0.000159639	0.000261291	-0.610964	0.541224	2896	Zc
ADPmid_DisAgg	-0.000497477	0.000827978	-0.600834	0.547951	3079	CPP
FI_wb_PAC1Psel_DoublePos%	-0.000531521	0.000885687	-0.600123	0.548424	2789	niCFPWV
ADPmid_AUC.std	0.000135762	0.000231122	0.587402	0.556934	3079	Zc
FI_prp_PAC1%	0.000739534	0.00125972	0.587064	0.557161	2764	CPP
AAeMax	0.000125321	0.000214938	0.583057	0.559855	2846	Zc
AA_AUC.std	0.000103271	0.000177452	0.581966	0.56059	3257	Zc
ADPhigh_PrimAgg	-0.000440842	0.00075881	-0.580965	0.561264	3069	niCFPWV
TTAS_AUC	-0.000773176	0.00134298	-0.575715	0.564808	1084	niCFPWV
MPtrapAgg	-0.000142624	0.000249306	-0.572086	0.567263	3340	Zc
RistoeMax	-0.000149136	0.000262406	-0.568342	0.569803	2979	Zc
EpiaucMean	0.000647487	0.00114586	0.565064	0.57203	3000	CPP
MPcolAUC	-0.000438312	0.000777957	-0.563414	0.573153	3329	niCFPWV
Risto_DisAgg	0.000108753	0.000199918	0.543989	0.586449	3229	Zc
MPadpVel	0.000580745	0.00109098	0.532313	0.594509	3340	CPP
ADPeMax	-0.000636092	0.00120123	-0.529534	0.596435	3007	CPP
Epi10_MaxAgg	-0.000347722	0.000662639	-0.524754	0.599755	3254	niCFPWV
EpiAgg40	0.000600521	0.00114962	0.522364	0.601417	2976	CPP
ADPAgg40	0.000610133	0.00118646	0.514246	0.60708	2968	CPP
Ristoslope	0.000134547	0.000264645	0.508407	0.611168	2945	Zc
ADPecMax	9.49061e-05	0.000186877	0.507854	0.611556	2995	Zc
FI_wb_PAC1Psel_DoublePos%	0.000618812	0.00121987	0.507279	0.611959	2798	CPP
AAslope	-0.000436082	0.000871138	-0.50059	0.61666	2777	niCFPWV
U46619aucMean	-0.000596925	0.00120623	-0.494868	0.620693	2962	CPP
ADPhigh_MaxAgg	-0.000493037	0.00100147	-0.492313	0.622498	3259	CPP
ColleMax	0.000122276	0.000248372	0.492311	0.6225	2973	Zc
MPtrapAUC	0.000120502	0.000248356	0.4852	0.627534	3340	Zc
FI_prp_PAC1%	-0.000134451	0.000278782	-0.482281	0.629606	2764	Zc
MPtrapAgg	0.000554532	0.00114984	0.482271	0.629614	3340	CPP
ADPlow_FinAgg	0.000521245	0.00109236	0.477173	0.633239	3024	CPP
ADPaucMean	0.000564449	0.00118395	0.476753	0.633538	2995	CPP
ADPhigh_MaxAgg	-0.000341343	0.000721253	-0.473264	0.636025	3246	niCFPWV
AAec50	0.000529057	0.00112128	0.471833	0.637046	2696	CPP
ADPAgg20	-0.000413895	0.000880267	-0.470193	0.638217	2926	niCFPWV
Trap_PrimAgg	0.000537528	0.00114547	0.469263	0.638882	3265	CPP
ADPhigh_FinAgg	-0.000450852	0.000965372	-0.467024	0.640483	3259	CPP
Epi10_FinAgg	-0.000308077	0.000664273	-0.463781	0.642805	3254	niCFPWV
Aa_FinAgg	8.02895e-05	0.000174225	0.460838	0.644915	3260	Zc
ADPhigh_DisAgg	-0.000266488	0.000596738	-0.446574	0.655183	3259	CPP
Aa_MaxAgg	7.77886e-05	0.000175784	0.442524	0.65811	3260	Zc
Aa_PrimAgg	7.77886e-05	0.000175784	0.442524	0.65811	3260	Zc
AAaucMean	-0.000439324	0.000997935	-0.440233	0.659769	2787	CPP
MPristoAUC	-0.000438344	0.00100521	-0.436073	0.662784	3301	CPP
MPaspiVel	0.000372274	0.000863104	0.431321	0.666235	3202	CPP
U46619slope	-0.000520671	0.00121107	-0.429925	0.66725	2956	CPP
ADPAgg40	0.000104322	0.000257293	0.405458	0.685141	2968	Zc
Aa_PrimSlope	0.000230213	0.000577634	0.398545	0.690229	3247	niCFPWV
ADPlow_AUC.std	9.57206e-05	0.000242251	0.39513	0.692747	3024	Zc
Epi10_AUC.std	-0.000355684	0.000923368	-0.385203	0.700087	3265	CPP
Epiec50	0.000442933	0.00116311	0.380816	0.70334	2977	CPP
FI_wb_PAC1%	-0.000338344	0.000897076	-0.377163	0.706052	2789	niCFPWV
RistoaucMean	9.4082e-05	0.000249545	0.377015	0.706163	2949	Zc
CollAgg40	-9.32959e-05	0.000252504	-0.369483	0.711768	2935	Zc
Collec50	-9.22837e-05	0.000255311	-0.361455	0.717759	2938	Zc
TRAP6aucMean	-0.000452975	0.00127336	-0.355733	0.722041	2699	CPP
Coll_FinAgg	0.000399486	0.00114714	0.348244	0.727657	3088	CPP
RistoaucMean	0.000391414	0.00115083	0.340115	0.73377	2949	CPP
Risto_AUC.std	8.31183e-05	0.000251092	0.331027	0.740624	3228	Zc
Coll_AUC.std	0.000317967	0.000965561	0.329308	0.741923	3085	CPP
Aa_MaxAgg	-0.000266421	0.000809089	-0.329286	0.74194	3260	CPP
Aa_PrimAgg	-0.000266421	0.000809089	-0.329286	0.74194	3260	CPP
ADPaucMean	8.36895e-05	0.000256847	0.325835	0.74455	2995	Zc
AA_AUC.std	-0.00025061	0.000817851	-0.306425	0.759281	3257	CPP
MPadpAUC	0.000333161	0.00110202	0.302318	0.76241	3340	CPP
ADPAgg20	7.7182e-05	0.000260502	0.296282	0.767015	2932	Zc
Risto_AUC.std	0.000337867	0.00115645	0.292159	0.770165	3228	CPP
Aa_FinAgg	-0.000225491	0.000801957	-0.281176	0.778575	3260	CPP
ADPlow_DisAgg	-0.000274924	0.000987538	-0.278394	0.78071	3024	CPP
Ristoslope	-0.000330663	0.00122072	-0.270875	0.786487	2945	CPP
Risto_DisAgg	-0.000247253	0.000920171	-0.268703	0.788158	3229	CPP
ADPec50	6.51383e-05	0.000257067	0.253391	0.799966	2973	Zc
ADPeMax	-0.000220728	0.0008794	-0.250998	0.801815	2999	niCFPWV
ADPslope	0.000214986	0.00087908	0.244558	0.806798	2987	niCFPWV
FI_prp_PAC1_Psel_DoublePos%	-6.76171e-05	0.000278294	-0.24297	0.808028	2764	Zc
AAslope	-6.23966e-05	0.000261741	-0.238391	0.811578	2784	Zc
Trap_AUC.std	0.000273763	0.00116147	0.235705	0.813662	3264	CPP
AAAgg20	0.000258691	0.00110251	0.234638	0.81449	2584	CPP
Epi10_MaxAgg	-0.00021034	0.000918411	-0.229026	0.818849	3267	CPP
FI_wb_PSel%	0.000273599	0.00120994	0.226126	0.821103	2798	CPP
Aa_PrimSlope	0.000173206	0.000799853	0.216548	0.828561	3260	CPP
RistoAgg40	5.35675e-05	0.000250139	0.214151	0.830429	2901	Zc
ADPlow_MaxAgg	5.03839e-05	0.000241439	0.208682	0.834697	3024	Zc
Epi10_AUC.std	-4.16598e-05	0.0002003	-0.207986	0.83524	3265	Zc
FI_prp_PAC1%	-0.000189396	0.000915607	-0.206853	0.836125	2753	niCFPWV
U46619Agg20	-0.000251053	0.0012215	-0.205529	0.837159	2901	CPP
ADPhigh_AUC.std	-0.000206743	0.00102277	-0.202139	0.839808	3257	CPP
RistoAgg40	0.000223862	0.0011538	0.194022	0.846159	2901	CPP
Coll_AUC.std	0.000132402	0.0007035	0.188205	0.850716	3075	niCFPWV
ADPlow_PrimSlope	0.000144708	0.000790244	0.183119	0.854705	3015	niCFPWV
AAecMax	3.86934e-05	0.000212815	0.181817	0.855726	2787	Zc
FI_wb_PAC1Psel_DoublePos%	-4.79855e-05	0.000268885	-0.178461	0.858361	2798	Zc
Epi10_FinAgg	3.55974e-05	0.000199952	0.17803	0.8587	3267	Zc
ADPslope	4.36258e-05	0.00026132	0.166944	0.867414	2994	Zc
ADPmid_PrimSlope	0.000130596	0.000801681	0.162902	0.870595	3069	niCFPWV
CollecMax	-3.00267e-05	0.000187968	-0.159744	0.873083	2953	Zc
Risto_PrimAgg	0.000180872	0.00113821	0.158909	0.873741	3228	CPP
ADPmid_FinAgg	3.64384e-05	0.000229497	0.158775	0.873846	3079	Zc
RistoeMax	-0.000185829	0.00120765	-0.153877	0.877707	2979	CPP
CollaucMean	-3.79552e-05	0.000252337	-0.150415	0.880438	2953	Zc
ADPmid_SecAgg	-9.28177e-05	0.000632845	-0.146667	0.883395	3069	niCFPWV
MPristoVel	-0.000135031	0.000942359	-0.14329	0.886061	3301	CPP
ADPslope	0.000157008	0.00120438	0.130365	0.896278	2994	CPP
ADPecMax	8.0059e-05	0.000630802	0.126916	0.899007	2988	niCFPWV
Ristoec50	-3.06116e-05	0.000248509	-0.123181	0.901964	2918	Zc
MPaspiAUC	0.000102564	0.000873464	0.117422	0.906525	3202	CPP
U46619eMax	2.85388e-05	0.000261649	0.109073	0.913145	2991	Zc
MPaspiAgg	-9.58585e-05	0.000879303	-0.109016	0.913189	3202	CPP
RistoecMax	-0.000106535	0.00101343	-0.105124	0.916278	2949	CPP
Trap_PrimSlope	0.000113787	0.00115566	0.0984608	0.921566	3265	CPP
FI_wb_PAC1%	-2.57166e-05	0.000272683	-0.0943095	0.924863	2798	Zc
Coll_PrimAgg	-0.000104842	0.00112229	-0.0934185	0.925571	3268	CPP
MPristoAgg	9.56467e-05	0.00104972	0.0911162	0.9274	3301	CPP
Coll_MaxAgg	-0.000101637	0.00112231	-0.09056	0.927842	3269	CPP
Epi10_FinAgg	-8.12888e-05	0.000920696	-0.0882906	0.929646	3267	CPP
Coll_LagTim	1.85587e-05	0.000212414	0.0873704	0.930377	3268	Zc
Coll_AUC.std	1.60652e-05	0.000209681	0.0766173	0.938928	3085	Zc
FI_prp_PAC1_Psel_DoublePos%	6.79894e-05	0.000913939	0.0743916	0.940699	2753	niCFPWV
RistoecMax	-1.50322e-05	0.000219618	-0.0684469	0.94543	2949	Zc
ADPlow_PrimAgg	-5.07657e-05	0.000812862	-0.062453	0.950202	3015	niCFPWV
EpiecMax	1.15753e-05	0.000193852	0.0597119	0.952385	3000	Zc
ADPhigh_PrimAgg	5.45654e-05	0.00104057	0.052438	0.95818	3079	CPP
Trap_FinAgg	-5.43778e-05	0.00114651	-0.0474291	0.962171	3265	CPP
ADPlow_FinAgg	8.98471e-06	0.00023719	0.0378798	0.969784	3024	Zc
MPadpAgg	-4.19543e-05	0.00112255	-0.037374	0.970187	3340	CPP
Epi10_MaxAgg	6.9846e-06	0.000199458	0.0350179	0.972065	3267	Zc
Trap_MaxAgg	2.5598e-05	0.00114351	0.0223854	0.98214	3265	CPP
MPaspiVel	2.72975e-06	0.000187517	0.0145573	0.988385	3202	Zc
Ristoec50	3.66364e-06	0.00114667	0.00319504	0.997451	2918	CPP
U46619eMax	-2.24305e-06	0.00121104	-0.00185217	0.998522	2991	CPP
ADPlow_DisAgg	-3.23747e-08	0.000214553	-0.000150893	0.99988	3024	Zc
